1 Environment as a limiting factor of the historical global spread of mungbean

2

3 Pei-Wen Ong<sup>1</sup>, Ya-Ping Lin<sup>2,3</sup>, Hung-Wei Chen<sup>2</sup>, Cheng-Yu Lo<sup>2</sup>, Marina Burlyaeva<sup>4</sup>, Thomas  
4 Noble<sup>5</sup>, Ramakrishnan Nair<sup>6</sup>, Roland Schafleitner<sup>3</sup>, Margarita Vishnyakova<sup>4</sup>, Eric Bishop-von-  
5 Wettberg<sup>7,8</sup>, Maria Samsonova<sup>8</sup>, Sergey Nuzhdin<sup>9</sup>, Chau-Ti Ting<sup>10</sup>, Cheng-Ruei Lee<sup>1,2\*</sup>

6

7 1. Institute of Plant Biology, National Taiwan University, Taipei 10617, Taiwan

8 2. Institute of Ecology and Evolutionary Biology, National Taiwan University, Taipei 10617,  
9 Taiwan

10 3. World Vegetable Center Headquarter, Tainan 74199, Taiwan

11 4. Federal Research Centre All-Russian N.I. Vavilov Institute of Plant Genetic Resources  
12 (VIR), St. Petersburg, Russia

13 5. Australian Department of Agriculture and Fisheries, Warwick, Queensland 4370, Australia

14 6. World Vegetable Center South and Central Asia, ICRISAT Campus, Patancheru, Hyderabad,  
15 Telangana 502324, India

16 7. Department of Plant and Soil Science and Gund Institute for the Environment, University of  
17 Vermont, Burlington, VT 05405, USA

18 8. Department of Applied Mathematics, Peter the Great St. Petersburg Polytechnic University,  
19 St. Petersburg, Russia

20 9. University of Southern California, Los Angeles, CA 90089, USA

21 10. Department of Life Science, National Taiwan University, Taipei 10617, Taiwan

22

23 \* Author of correspondence

24 Cheng-Ruei Lee

25 chengrueilee@ntu.edu.tw

26 **Abstract**

27 While the domestication history has been investigated in many crops, the process of cultivation  
28 range expansion and factors governing this process received relatively little attention. Here using  
29 mungbean (*Vigna radiata* var. *radiata*) as a test case, we investigated the genomes of more than  
30 one thousand accessions to illustrate climatic adaptation's role in dictating the unique routes of  
31 cultivation range expansion. Despite the geographical proximity between South and Central Asia,  
32 genetic evidence suggests mungbean cultivation first spread from South Asia to Southeast, East,  
33 and finally reached Central Asia. Combining evidence from demographic inference, climatic  
34 niche modeling, plant morphology, and records from ancient Chinese sources, we showed that  
35 the specific route was shaped by the unique combinations of climatic constraints and farmer  
36 practices across Asia, which imposed divergent selection favoring higher yield in the south but  
37 short-season and more drought-tolerant accessions in the north. Our results suggest that  
38 mungbean did not radiate from the domestication center as expected purely under human activity,  
39 but instead the spread of mungbean cultivation is highly constrained by climatic adaptation,  
40 echoing the idea that human commensals are more difficult to spread through the south-north axis  
41 of continents.

## 42 **Main Text**

### 43 **Introduction**

44 Domestication is a process where plants or animals were cultivated by humans, leading to  
45 associated genetic and morphological changes. These changes may be intentional from human  
46 selection or unintentional as a result of adaptation to the environments of cultivation (Fuller,  
47 2007). Later, the cultivated plants spread out from their initial geographical range (Meyer and  
48 Purugganan, 2013), and elucidating the factors affecting the range expansion of crops is another  
49 focus of active research (Gutaker et al., 2020). In the old world, during the process of “prehistory  
50 food globalization” (Jones et al., 2011), crops originated from distinct regions were transported  
51 and grown in Eurasia. Archeological evidence has shown that such “trans-Eurasian exchange”  
52 had happened by 1500 BC (Liu et al., 2019), and the proposed spread routes from archeological  
53 studies were supported by modern genetic evidence especially in rice (Gutaker et al., 2020) and  
54 barley (Lister et al., 2018). Interestingly, the spread may accompany genetic changes for the  
55 adaptation to novel environments. For example, in barley, variations in the gene *Photoperiod-H1*  
56 (*Ppd-H1*) resulting in the non-responsiveness to longer daylengths were likely associated with  
57 the historical expansion to high-latitude regions (Jones et al., 2008; Jones et al., 2016). While  
58 these mid-latitude cereals have been extensively studied, investigations of crops originated from  
59 other climate zones are needed. Using the South Asian legume mungbean as a test case, here we  
60 investigate how climatic adaptation might affect crop spread route and the evolutionary changes  
61 making such spread possible.

62 Mungbean (*Vigna radiata* (L.) Wilczek var. *radiata*), also known as green gram, is an  
63 important grain legume in Asia (Nair and Schreinemachers, 2020), providing carbohydrates,  
64 protein, folate, and iron for local diets and thereby contributing to food security (Kim et al., 2015).  
65 Among pulses, mungbean is capable of tolerating moderate drought or heat stress and has a  
66 significant role in rainfed agriculture across arid and semi-arid areas (Pratap et al., 2019), which  
67 are likely to have increased vulnerabilities to climate change. Although there have been studies  
68 about the genetic diversity of cultivated and wild mungbean (Ha et al., 2021; Kang et al., 2014;  
69 Noble et al., 2018; Sangiri et al., 2007), the evolutionary history of cultivated mungbean after  
70 domestication still lacks genetic studies. Existing archeological evidence suggests that South Asia

71 is the probable area of mungbean domestication, and at least two independent domestication  
72 events have been suggested, including Maharashtra and the eastern Harappan zone (Fuller and  
73 Harvey, 2006). The early archeological records suggest that the selection of large seed sizes  
74 occurred in the eastern Harappan zone by the 3<sup>rd</sup> millennium BC and in Maharashtra, dating to  
75 the late 2<sup>nd</sup> to early 1<sup>st</sup> millennium BC (Fuller and Harvey, 2006). This pulse later spread to  
76 mainland Southeast Asia and has been reported in southern Thailand dating to the late first  
77 millennium BC (Castillo et al., 2016). Further north, the earliest record of mungbean in China  
78 was from the book *Qimin Yaoshu* (齊民要術, 544 AD). While mungbean is also cultivated in  
79 Central Asia today, it was not identified in archaeobotanical evidence ranging from several  
80 millennium BC to the medieval period (Miller, 1999; Spengler et al., 2018b; Spengler et al., 2017),  
81 suggesting later arrival. While the archaeobotanical studies elucidated the route of mungbean  
82 cultivation range expansion, researches are still needed to identify the genetic evidence and  
83 factors shaping such spread route.

84 A recent genetic study revealed that present-day cultivated mungbeans have the same  
85 haplotype in the promoter region reducing the expression of *VrMYB26a* (Lin et al., 2022), a  
86 candidate gene controlling the important domestication trait, pod shattering, in several *Vigna*  
87 species (Takahashi et al., 2020). This suggests the loss of pod shattering phenotype in cultivated  
88 mungbean may have a common origin, and despite the archaeobotanical findings of several  
89 independent early cultivations of mungbean in South Asia (Fuller and Harvey, 2006), descendants  
90 from one of these cultivation origins might have dominated South Asia before the pan-Asia  
91 expansion. Since large regions remain archaeologically unexplored, utilization of genetic data  
92 can be a crucial complementation to reconstruct crop evolutionary history. Using seed proteins  
93 (Tomooka et al., 1992) and isozymes (Dela Vina and Tomooka, 1994), previous studies proposed  
94 two expansion routes out of India, one in the south to Southeast Asia and the other in the north  
95 along the silk road to China. While later studies used DNA markers to investigate mungbean  
96 population structure (Breria et al., 2020; Gwag et al., 2010; Islam and Blair, 2018; Noble et al.,  
97 2018; Sandhu and Singh, 2021; Sangiri et al., 2007), few have examined these hypothesized  
98 routes in detail. Therefore, genomic examination of the cultivation range expansion proposed by  
99 archaeobotanical studies and the elucidation of its contributing factors are strongly needed.

100 In this study, we compiled an international effort, reporting a global mungbean diversity  
101 panel of more than 1,100 accessions derived from (i) the mungbean mini-core collection of the  
102 World Vegetable Centre (WorldVeg) genebank, (ii) the Australian Diversity Panel (ADP), and  
103 (iii) the Vavilov Institute (VIR), which hosts a one-century-old collection enriched with mid-  
104 latitude Asian accessions that are underrepresented in other genebanks, many of which were old  
105 landraces collected by Nikolai I. Vavilov and his teams in the early 20<sup>th</sup> century (Burlyaeva et al.,  
106 2019). These germplasms harbor a wide range of morphological variations (Figure 1A) and  
107 constitute the most comprehensive representation of worldwide mungbean genetic variation. We  
108 used this resource to investigate the global history of mungbean after domestication to reveal a  
109 spread route highly affected by climatic constraints across Asia, eventually shaping the  
110 phenotypic characteristics for local adaptation to distinct environments.

## 111 **Results**

### 112 **Population structure and spread of mungbean**

113 Using DArTseq, we successfully obtained new genotype data of 290 mungbean accessions from  
114 VIR (Supplementary file 1). Together with previous data (Breria et al., 2020; Noble et al., 2018),  
115 our final set included 1,108 samples with 16 wild and 1,092 cultivated mungbean. A total of  
116 40,897 single nucleotide polymorphisms (SNPs) were obtained. Of these, 34,469 bi-allelic SNPs,  
117 with a missing rate less than 10%, were mapped on 11 chromosomes and retained for subsequent  
118 analyses.

119 The genetic structure was investigated based on the 10,359 LD-pruned SNPs. Principal  
120 component analysis (PCA, Figure 1C) showed a triangular pattern of genetic variation among  
121 cultivated mungbeans, consistent with previous studies (Breria et al., 2020; Noble et al., 2018;  
122 Sokolkova et al., 2020) and ADMIXTURE  $K = 3$  (Figure 1B). The geographic distribution of  
123 these genetic groups is not random, as these three groups are distributed in South Asia (India and  
124 Pakistan), Southeast Asia (Cambodia, Indonesia, Philippines, Thailand, Vietnam, and Taiwan),  
125 and more northerly parts of Asia (China, Korea, Japan, Russia, and Central Asia). As  $K$   
126 increased, the cross-validation (CV) error decreased a little after  $K = 4$  (Figure 1-figure  
127 supplement 1), where the north group could be further divided (Figure 1B). Therefore, worldwide  
128 diversity of cultivated mungbean could be separated into four major genetic groups corresponding

129 to their geography: South Asian (SA), Southeast Asian (SEA), East Asian (EA), and Central  
130 Asian (CA) groups. Note that the genetic groups were named after the region where most of their  
131 members distribute, and exceptions exist. For example, many EA accessions also distribute in  
132 Central Asia, and some SEA accessions were found near the eastern and northeastern coasts of  
133 India. Throughout this work, we make clear distinction between genetic group names (e.g., SA)  
134 and a geographic region (e.g., South Asia). Therefore, unlike any other previous work in this  
135 species, this study incorporates global genetic variation among cultivated mungbean of this  
136 important crop.

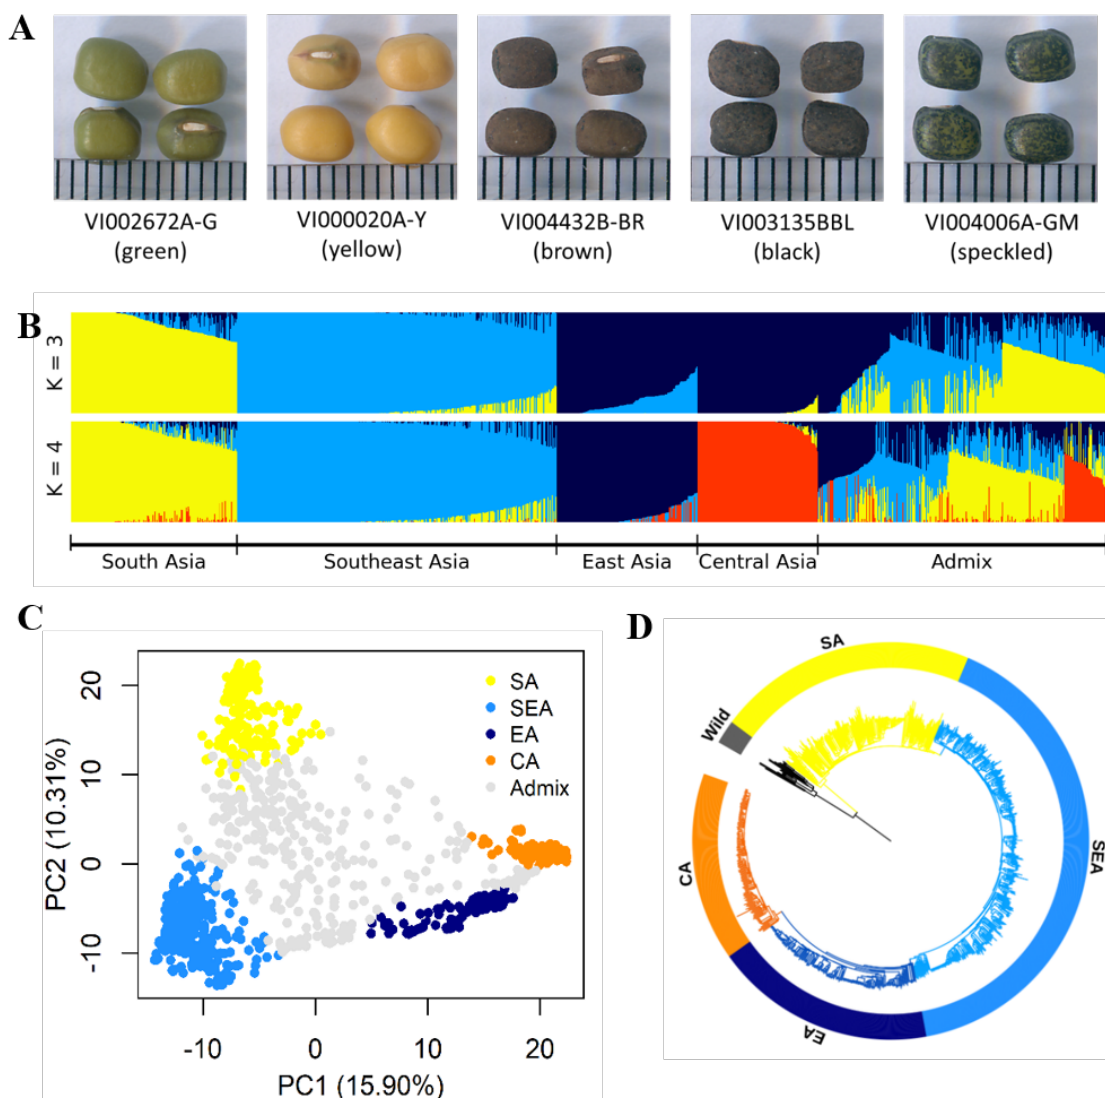

**Figure 1.** Diversity of worldwide mungbean. (A) Variation in seed colour. (B) ADMIXTURE ancestry coefficients, where accessions were grouped by group assignments ( $Q \geq 0.7$ ). (C) Principal component analysis (PCA) plot of 1,092 cultivated mungbean accessions. Accessions were coloured based on their assignment to four inferred genetic groups ( $Q \geq 0.7$ ), while accessions with  $Q < 0.7$  were coloured gray. (D) Neighbor-joining (NJ) phylogenetic tree of 788 accessions with  $Q \geq 0.7$  with wild mungbean as outgroup (black colour).

138 Using wild progenitor *V. radiata* var. *sublobata* (Wild hereafter) as the outgroup, the  
139 accession-level (Figure 1D) and population-level (Figure 2A) phylogenies both suggest CA to be  
140 genetically closest to EA. The SEA group is more distant, and SA is the most diverged. This  
141 relationship is supported by the outgroup  $f_3$  tests showing EA and CA share the most genetic drift,  
142 followed by SEA and SA (Supplementary file 2). Pairwise  $F_{ST}$  and  $d_{xy}$  also give the same  
143 conclusion (Figure 2B). Similarly, the  $f_4$  tests (Figure 2C) strongly reject the cases where SEA  
144 and CA form a clade relative to SA and EA ( $f_4(\text{SA,EA;SEA,CA}) = 0.016$ ,  $Z = 9.519$ ) or SEA and  
145 EA form a clade relative to SA and CA ( $f_4(\text{SA,CA;SEA,EA}) = 0.021$ ,  $Z = 13.956$ ), again  
146 suggesting EA and CA to be closest. With regards to the relationship among Wild, SA, SEA, and  
147 EA,  $f_4$  tests suggest SEA and EA form a clade relative to Wild and SA (non-significant results in  
148  $f_4(\text{Wild,SA;EA,SEA})$  but opposite in other combinations). Notably, both TreeMix (Figure 2A)  
149 and the  $f_4$  test (Figure 2C,  $f_4(\text{SA,SEA;CA,EA}) = 0.005$ ,  $Z = 6.843$ ) suggest gene flow between  
150 SEA and EA. Consistent with archeological evidence of South Asian domestication, the  
151 nucleotide diversity ( $\pi$ ) decreased from SA ( $1.0 \times 10^{-3}$ ) to SEA ( $7.0 \times 10^{-4}$ ) and EA ( $5.0 \times 10^{-4}$ ),  
152 while the CA group has lowest diversity ( $3.0 \times 10^{-4}$ ) (Figure 2B). LD also decays the fastest in  
153 Wild and then the SA group (Figure 2D), followed by other genetic groups. In summary, all  
154 analyses are consistent with our proposed order of cultivated mungbean divergence.

155 Our proposed demographic history could be confounded by factors such as complex  
156 hybridization among groups. For example, SEA and CA might have independently originated  
157 from SA and later generated a hybrid population in EA (Figure 2-figure supplement 1A). Other  
158 possibilities are that either SEA or CA are the hybrid of other populations (Figure 2-figure  
159 supplement 1B and C). We examined these possibilities using  $f_3$  statistics for all possible trios  
160 among the four groups. None of the tests gave a significantly negative  $f_3$  value (Supplementary  
161 file 3), suggesting the lack of a strong alternative model to our proposed relationship among these  
162 four groups.

163 Based on the solid relationship among these genetic groups, we used fastsimcoal2 to  
164 model their divergence time, allowing population size change and gene flow at all time points  
165 (Figure 2-figure supplement 2A-D). According to this model, after initial domestication, the out-  
166 of-India event (when other groups diverged from SA) happened about 8.3 thousand generations  
167 ago (kga) with 75% parametric bootstrap range between 4.7 and 11.3 kga. Not until more than



168 five thousand generations later (2.7 kga, 75% range 1.1-4.6 kga) did SEA diverge from the  
169 common ancestor of present-day EA and CA. CA diverged from EA only very recently (0.2 kga,  
170 75% range 0.1-0.8 kga). Note that the divergence time was estimated in the number of generations,  
171 and the much longer growing seasons in the southern parts of Asia may allow more than one  
172 cropping season per year (Mishra et al., 2022; Vir et al., 2016).

173 Our results suggest the non-South-Asian accessions have a common origin out of India  
174 (otherwise these groups would branch off independently from the SA group). Given this, the  
175 phylogenetic relationship (Figure 2A) is consistent with the following hypotheses. (1) The east  
176 hypothesis: Mungbean expanded eastwards and gave rise to the SEA group. This group might  
177 initially occupy northeast South Asia and later expanded to Southeast Asia either through the land  
178 or maritime route (Castillo et al., 2016; Fuller et al., 2011). The group later expanded northwards  
179 as EA. EA expanded westwards into Central Asia and gave rise to the CA group. (2) The north  
180 hypothesis: The group leaving South Asia first entered Central Asia as the EA group. EA  
181 expanded eastwards into East Asia through the Inner Asian Mountain Corridor (Stevens et al.,  
182 2016). The eastern population of EA expanded southwards as the SEA group, and later the  
183 western population of EA diverged as the CA group. (3) The northeast hypothesis: The group  
184 leaving South Asia (through either of the above-mentioned routes) was first successfully  
185 cultivated in northern East Asia without previously being established in Southeast Asia or Central  
186 Asia. The EA group then diverged southwards as SEA and later expanded westwards, giving rise  
187 to CA. Consistent with this model, the genetic variation of the EA group gradually declines from  
188 east to west, accompanied by the gentlest decline of precipitation per unit geographic distance  
189 across Asia (Figure 2F).

190 While all three hypotheses are consistent with the phylogeny (Figure 2A), the SEA group  
191 originated earlier than EA in the east hypothesis but later in the two other hypotheses. The former  
192 case predicts higher nucleotide diversity and faster linkage disequilibrium decay in SEA than EA,  
193 which is supported by our results (Figure 2B and D). While populations that were established in  
194 a region for an extended time could accumulate genetic differentiation, generating patterns of  
195 isolation by distance, rapid-spreading populations in newly colonized regions could not (Lee et  
196 al., 2017; The 1001 Genomes Consortium, 2016). Using this idea, Mantel's test revealed a  
197 significantly positive correlation between genetic and geographic distances for the SA genetic

198 group ( $r = 0.466$ ,  $P = 0.010$ ), followed by SEA ( $r = 0.252$ , although not as significant,  $P = 0.069$ ).  
199 No such association was found for EA ( $r = 0.030$ ,  $P = 0.142$ ) or CA ( $r = 0.087$ ,  $P = 0.172$ ). In  
200 addition, the southern groups (SA and SEA) together ( $r = 0.737$ ,  $P = 0.001$ ) have a much stronger  
201 pattern of isolation by distance than the northern groups (EA and CA,  $r = 0.311$ ,  $P = 0.001$ )  
202 (Figure 2E). Using  $Q \geq 0.5$  instead of  $Q \geq 0.7$  to assign individuals into genetic groups generated  
203 results that are largely consistent (Supplementary file 4). These results are again consistent with  
204 the “east hypothesis” that local accessions from the SA and SEA groups were established much  
205 earlier than those from EA and CA. Finally, the genetic variation of the EA group is highest in  
206 the eastern end and declines westwards (Figure 2F). This does not support the north hypothesis  
207 where EA first existed in Central Asia and expanded eastwards.

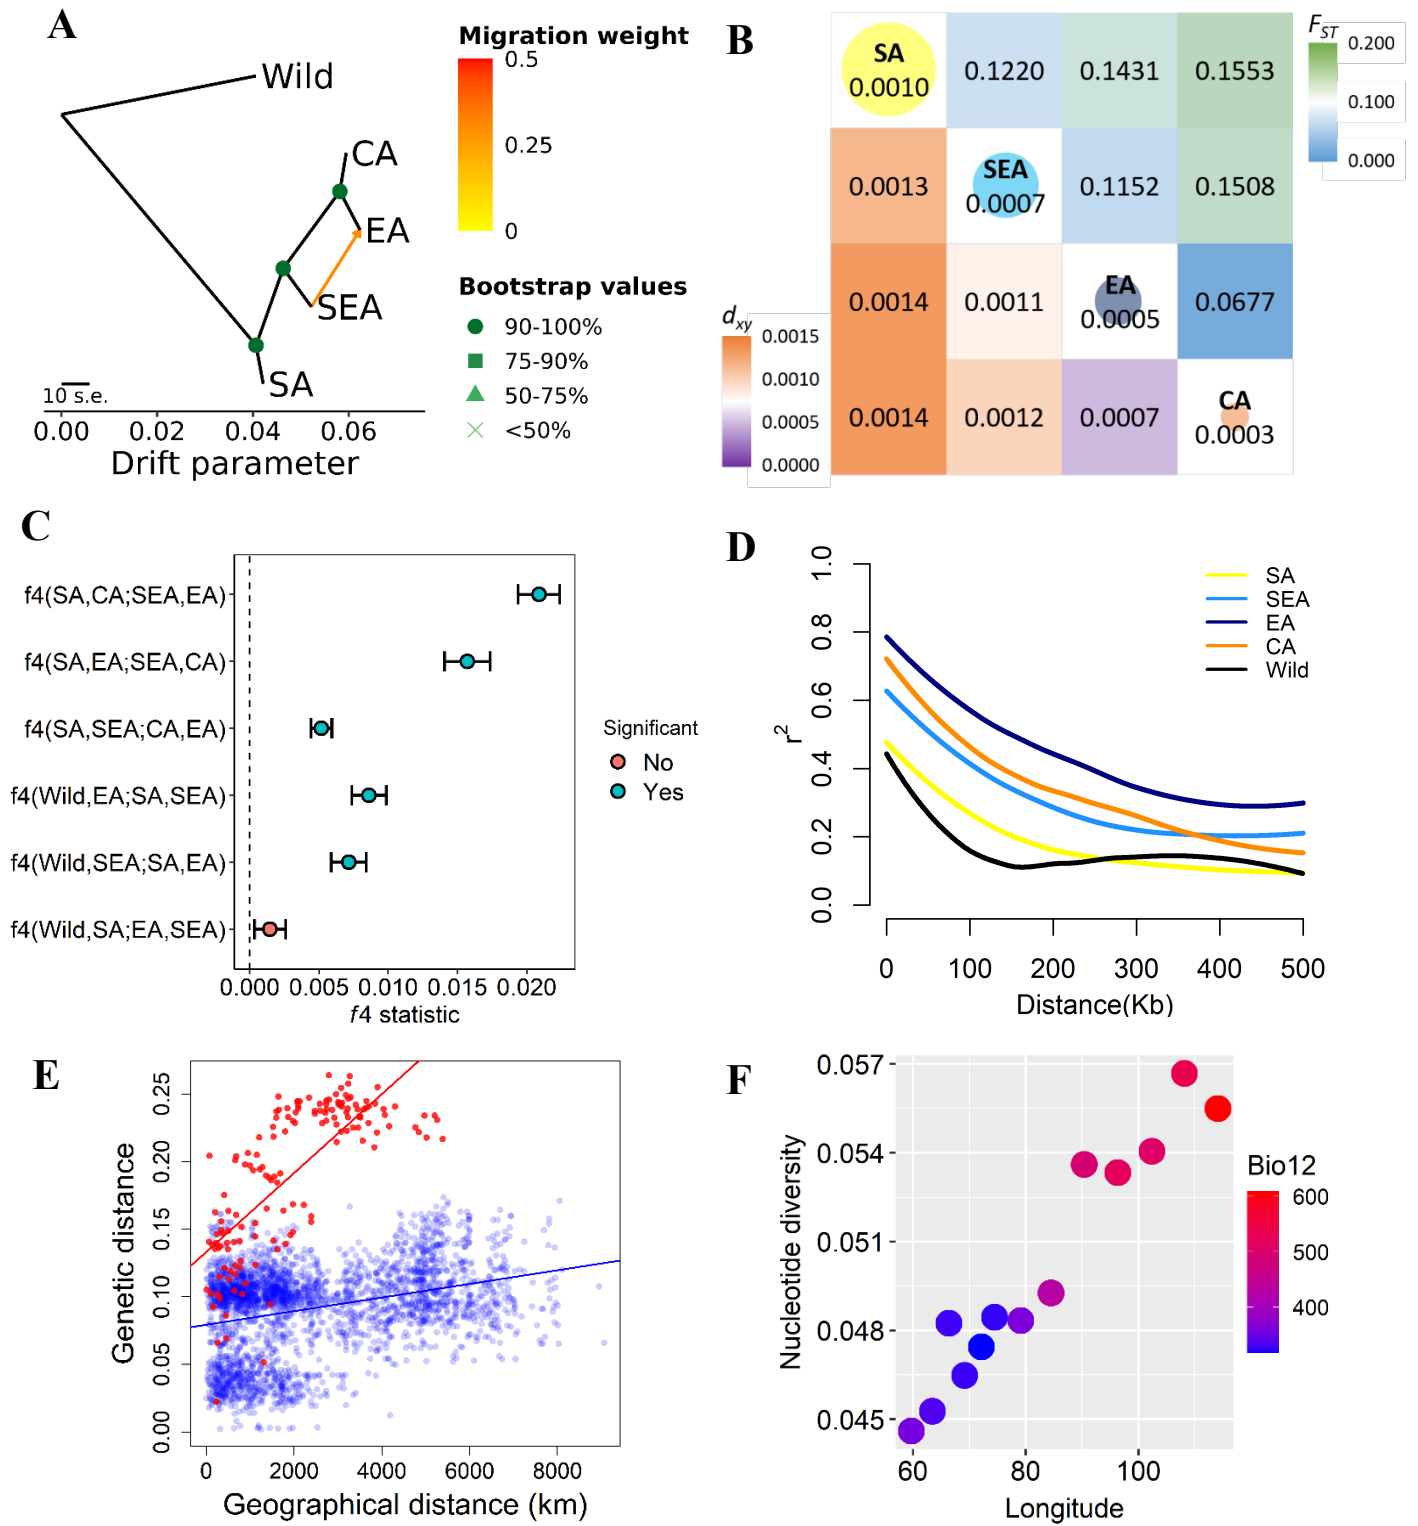

**Figure 2.** Fine-scale genetic relationship and admixture among four inferred genetic groups. (A) TreeMix topologies with one suggested migration event. Colours on nodes represent support values after 500 bootstraps. (B) Diversity patterns within and between inferred genetic groups as estimated using nucleotide diversity ( $\pi$  in diagonal, where the size of the circle represents the level of  $\pi$ ) and population differentiation ( $F_{ST}$  in upper diagonal and  $d_{xy}$  in lower diagonal). (C)  $f_4$  statistics. Points represent the mean  $f_4$  statistic and lines are the standard error. Only  $f_4$  statistics with Z-score  $> |3|$  are considered statistically significant. The dashed line denotes  $f_4 = 0$ . (D) Linkage disequilibrium (LD) decay. (E) Isolation by distance plot of genetic distance versus geographic distance, with the southern group in red circles and the northern group in blue circles. (F) Relationship between Bio12 (annual precipitation) and nucleotide diversity ( $\pi$ ) of the EA genetic group across the east-west axis of Asia. Dot colors represent the annual precipitation of each population.

## 210 **Environmental differentiation of the inferred genetic groups**

211 We further examined the possible causes governing the expansion of mungbean cultivation  
212 ranges. For a crop to be successfully cultivated in a new environment, dispersal and adaptation  
213 are both needed. Being a crop that has lost the ability of pod shattering, the spread of mungbean  
214 was governed by commerce or seed exchange. While barriers such as the Himalayas or Hindu  
215 Kush may limit human activity, South and Central Asia was already connected by a complex  
216 exchange network linking the north of Hindu Kush, Iran, and the Indus Valley as early as about  
217 4 thousand years ago (kya) (Dupuy, 2016; Kohl, 2007; Kohl and Lyonnet, 2008; Lamberg-  
218 Karlovsky, 2002; Lombard, 2020; Lyonnet, 2005), and some sites contain diverse crops  
219 originated across Asia (Spengler et al., 2021). Similarly, other ancient land or maritime exchange  
220 routes existed among South, Southeast, East, and Central Asia (Stevens et al., 2016). This  
221 suggests that mungbean could have been transported from South to Central Asia, but our genetic  
222 evidence suggests that the present-day CA group did not descend directly from the SA group.  
223 Therefore, we investigated whether climatic adaptation, that is, the inability of mungbean to  
224 establish in a geographic region after human-mediated long-range expansion, could be a  
225 contributing factor.

226 Multivariate analysis of variance (MANOVA) of eight bioclimatic variables (after  
227 removing highly-correlated ones; Supplementary file 5 and 6) indicated strong differentiation in  
228 the environmental niche space of the four genetic groups (Supplementary file 7 and 8). PCA of  
229 climatic factors clearly reflects geographic structure, where the axis explaining most variation  
230 (PC1, 42%) separates north and south groups and is associated with both temperature- and  
231 precipitation-related factors (Figure 3A and Supplementary file 9). Consistent with their  
232 geographic distribution, overlaps between EA and CA and between SA and SEA were observed.  
233 While these analyses were performed using bioclimatic variables from year-round data, we  
234 recognized that summer is the cropping season in the north. Parallel analyses using the  
235 temperature and precipitation of May, July, and September yielded similar results  
236 (Supplementary file 10; Figure 3-figure supplement 1).

237 Based on the Köppen climate classification (Köppen, 2011), we categorized the Asian  
238 mungbean cultivation range into six major climate zones (Figure 3-figure supplement 2): dry hot  
239 (BSh and BWh), dry cold (BSk and BWk), temperate dry summer (Csa), tropical savanna (Aw),

240 Continental (Dwb and Dfb), and temperate wet summer (Cfa and Cwa). The former three are  
241 relatively drier than the latter three zones. While SEA and CA are relatively homogeneous, SA  
242 and EA have about half of the samples in the dry and non-dry zones (Figure 3-figure supplement  
243 2). We therefore separated SA into SAe and SAw and EA into EAe and EAw, corresponding to  
244 the wetter eastern and drier western regions within the SA and EA ranges. Environmental niche  
245 modeling revealed distinct suitable regions of these six groups except for CA and EAw, whose  
246 geographical ranges largely overlap (Figure 3B). Consistent with PCA, pairwise Schoener's D  
247 values are smallest between the northern and southern groups while largest (suggesting overlaps  
248 of niche space) between the eastern and western subsets within north and south (Figure 3B),  
249 consistent with PCA that the major axis of climatic difference is between the northern and  
250 southern parts of Asia. Analyses using temperature and precipitation from May, July, and  
251 September yielded similar results (Figure 3-figure supplement 3). Given a single out-of-India  
252 event (Figure 2A), the results suggest it might be easier to first cultivate mungbean in Southeast  
253 rather than Central Asia, supporting the east hypothesis.

254         While both temperature and precipitation variables differ strongly between north and  
255 south, one should note that these year-round temperature variables do not correctly reflect  
256 conditions in the growing seasons. In the north, mungbean is mostly grown in summer where the  
257 temperature is close to the south (Figure 3-figure supplement 4A-C). On the other hand,  
258 precipitation differs drastically between the north and south, especially for the CA group, where  
259 the summer growing season is the driest of the year (Figure 3-figure supplement 4D). By  
260 estimating the regression slope of annual precipitation on geographical distance, we obtained a  
261 gradient of precipitation change per unit geographic distance between pairs of genetic groups  
262 (Figure 3C). Despite the SA-SEA transect having the steepest gradient (slope = 0.21), the spread  
263 from SA to SEA has been accompanied by an increase of precipitation and did not impose drought  
264 stress. However, the second highest slope (0.18) is associated with a strong precipitation decrease  
265 if the SA group were to disperse to Central Asia. Results from the precipitation of May, July, and  
266 September yielded similar conclusion (Figure 3-figure supplement 5). This likely explains why  
267 no direct historic spread is observed from South to Central Asia.

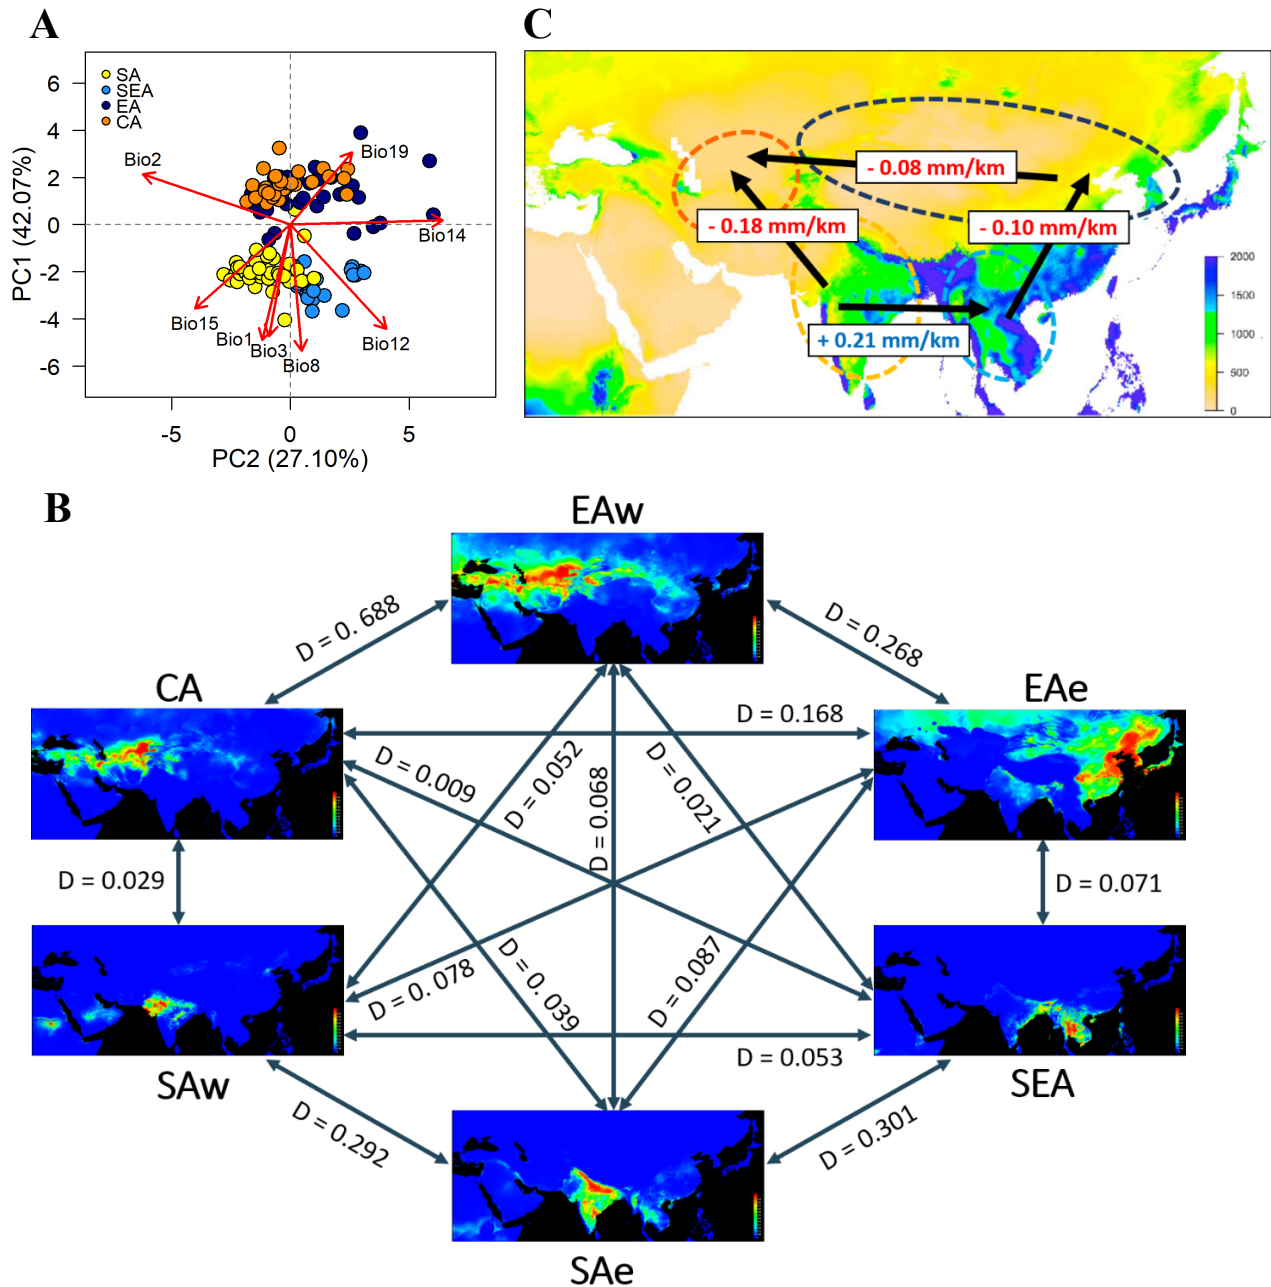

**Figure 3.** Environmental variation among genetic groups of mungbean. (A) Principal component analysis (PCA) of the eight bioclimatic variables. Samples are coloured according to four inferred genetic groups as indicated in the legend. (B) Predicted distribution at current climate conditions. Red colour indicates high suitability, and blue indicates low suitability. Values between pairs represent niche overlap measured using Schoener's D, and higher values represent higher overlaps. Abbreviations: SAw: South Asia (west), SAe: South Asia (east); SEA: Southeast Asia; EAe: East Asia (east); EAw: East Asia (west) and CA: Central Asia. (C) Environmental gradient across potential directions of expansion. The value on each arrow indicates a change in annual precipitation per kilometer. The background map is colored according to annual precipitation (Bio12, in mm).



## 269 **Trait variation among genetic groups**

270 If environmental differences constrained the spread route of mungbean, the current cultivated  
271 mungbean accessions occupying distinct environments should have locally adaptive traits for  
272 these environments. Indeed, PCA of four trait categories show substantial differences among  
273 genetic groups (phenology, reproductive output, and size in field trials, as well as plant weight in  
274 lab hydroponic systems, Figure 4A). In the field, CA appears to have the shortest time to  
275 flowering, the lowest yield in terms of seed size and pod number, and the smallest leaf size (Figure  
276 4B and Supplementary file 11). On the other hand, SEA accessions maximize seed size, while  
277 SA accessions specialize in developing the largest number of pods (Figure 4B). These results  
278 suggest that CA has a shorter crop duration, smaller plant size, and less yield, consistent with  
279 drought escape phenotypes. This is consistent with the northern short growing season constrained  
280 by temperature and daylength (below), as well as the low precipitation during the short season.

281 In terms of seedling response to drought stress, the  $Q_{ST}$  values of most traits (root, shoot,  
282 and whole plant dry weights under control and drought treatments) are higher than the tails of  
283 SNP  $F_{ST}$ , suggesting trait evolution driven by divergent selection (Figure 4C; Figure 4-figure  
284 supplement 6). Significant treatment, genetic group, and treatment by group interaction effects  
285 were observed except on a few occasions (Table 1). Consistent with field observation, SEA has  
286 the largest seedling dry weight (Figure 4D). While simulated drought significantly reduced shoot  
287 dry weight for all groups, the effect on SEA is especially pronounced (treatment-by-group  
288 interaction effect,  $F_{2,575} = 23.55$   $P < 0.001$ , Table 1 and Figure 4D), consistent with its native  
289 habitats with abundant water supply (Figure 3-figure supplement 4D and Supplementary file 12).  
290 All groups react to drought in the same way by increasing root:shoot ratio (Figure 4D), suggesting  
291 such plastic change may be a strategy to reduce transpiration. Despite the lack of treatment-by-  
292 group interaction ( $F_{2,575} = 1.39$ ,  $P > 0.05$ ), CA consistently exhibits a significantly higher  
293 root:shoot ratio, a phenotype that is potentially adaptive to its native environment of lower water  
294 supply (Figure 3-figure supplement 4D and Supplementary file 12).



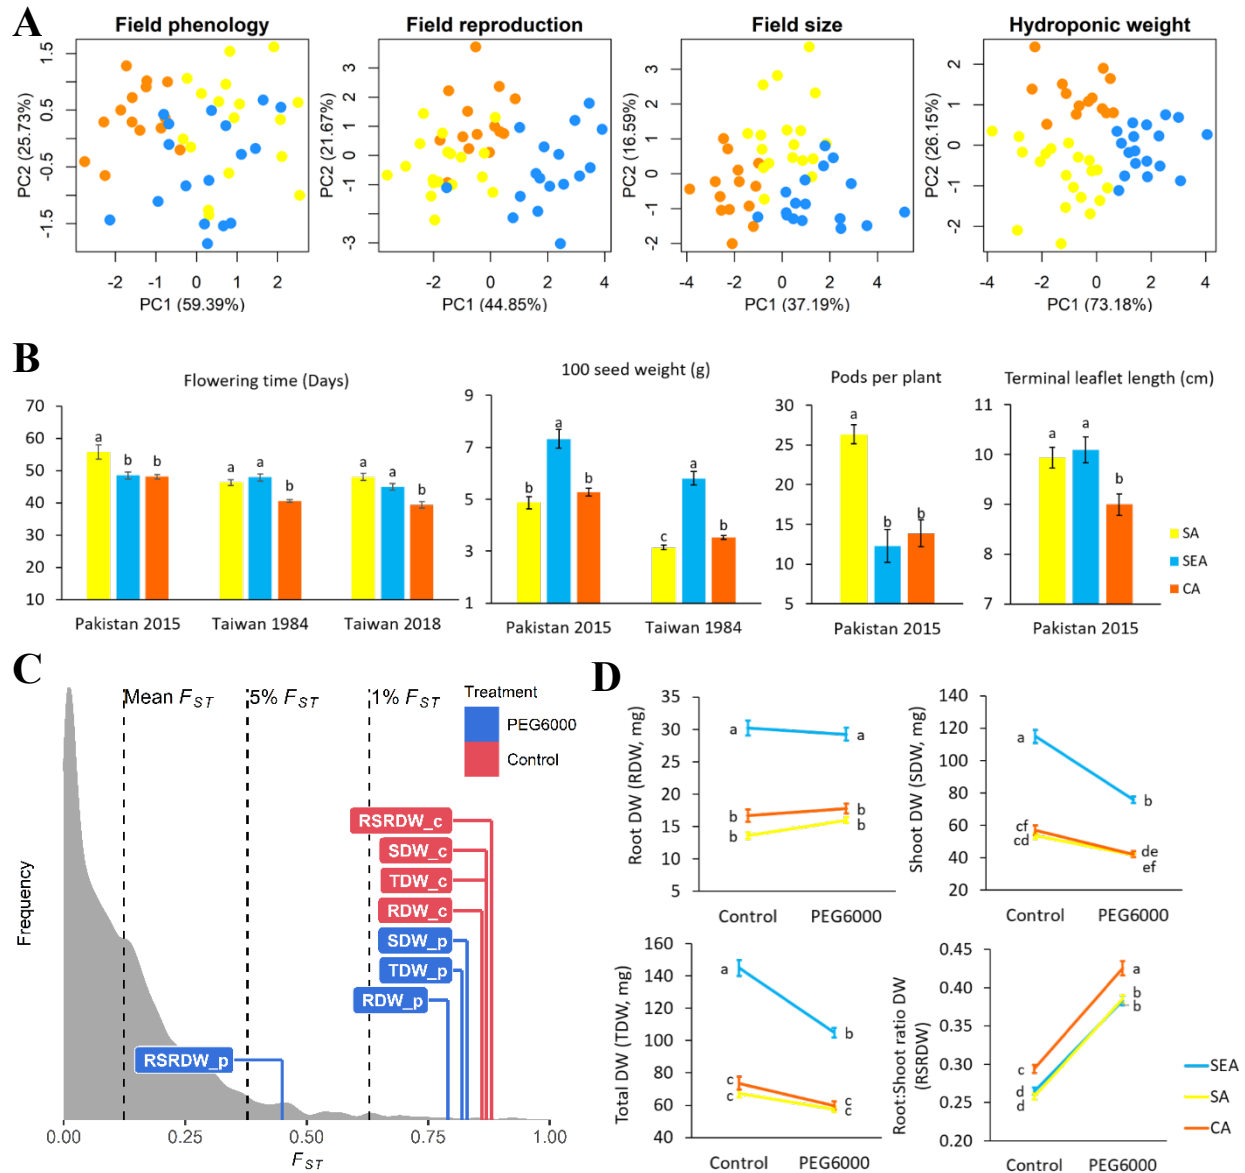

**Figure 4.** Quantitative trait differentiation among genetic groups. (A) Principal component analysis (PCA) of four trait categories. (B) Trait variability from common gardens in field experiments. (C) Comparison of  $Q_{ST}$ - $F_{ST}$  for four drought-related traits under two environments.  $F_{ST}$  values (mean, 5% and 1%) were indicated by black dashed lines. The  $Q_{ST}$  for each trait was colored according to treatment and was calculated as Equation 2 in Materials and Methods. Abbreviations: RDW: root dry weight; SDW: shoot dry weight; TDW: total dry weight; RSRDW: root:shoot ratio dry weight; c: control; p: PEG6000. (D) Effect of PEG6000 (-0.6 MPa) on root dry weight (RDW), shoot dry weight (SDW), total dry weight (TDW), and root:shoot ratio dry weight (RSRDW) among genetic groups. Data were expressed as the mean  $\pm$  standard error. Lowercase letters denote significant differences under Tukey's HSD in (B) and (D).

**Table 1.** Analysis of variance (ANOVA) *F* values for the dry weight (mg) of mungbean seedlings across three different genetic groups

296

| Source of variation       | df | RDW                  | SDW                   | TDW                  | RSRDW                 |
|---------------------------|----|----------------------|-----------------------|----------------------|-----------------------|
| Treatment                 | 1  | 2.65 <sup>n.s.</sup> | 133.26 <sup>***</sup> | 72.26 <sup>***</sup> | 978.76 <sup>***</sup> |
| Genetic group             | 2  | 60.63 <sup>***</sup> | 79.62 <sup>***</sup>  | 76.54 <sup>***</sup> | 13.27 <sup>***</sup>  |
| Treatment x Genetic group | 2  | 3.29 <sup>*</sup>    | 23.55 <sup>***</sup>  | 17.79 <sup>***</sup> | 1.39 <sup>n.s.</sup>  |

(df: degrees of freedom; RDW: root dry weight; SDW: shoot dry weight; TDW: total dry weight; RSRDW: root:shoot ratio dry weight. Significance level \*  $P < 0.05$ , \*\*\*  $P < 0.001$ , n.s. non-significant)

297

### 298 **Support from ancient Chinese sources**

299 Mungbean has been occasionally mentioned in ancient Chinese sources. Here we report the  
300 records associated with our proposed mungbean spread route and the underlying mechanisms.  
301 The “Classic of Poetry” (Shijing 詩經) contains poems dating between the 11<sup>th</sup> to 7<sup>th</sup> centuries  
302 BCE near the lower and middle reaches of the Yellow River. While crops (especially soy bean,  
303 菽), vegetables, and many other plants have been mentioned, mungbean was not recorded. This  
304 is consistent with our results that mungbean had not reached the northern parts of East Asia at  
305 that time (the EA group diverged from the SEA group at around 2.7 kya). The first written record  
306 of mungbean in China is in an agricultural encyclopedia Qimin Yaoshu (齊民要術, 544 AD,  
307 Chinese text and translation in Supplementary note), whose spatiotemporal background (~1.5 kya  
308 near the lower reaches of Yellow River) is again consistent with our estimated origin of the EA  
309 group.

310 Our results suggest that the expansion of the mungbean cultivation range may be  
311 associated with the novel phenotypic characteristics potentially adaptive to the new environments.  
312 This proposal would be rejected if the novel phenotypic characteristics appeared very recently.  
313 In support of our proposal, Xiangshan Yelu (湘山野錄, an essay collection during 1068-1077  
314 AD) recorded that mungbean from the southern parts of Asia had higher yield and larger grains  
315 than those in northern China (Chinese text and translation in Supplementary note). Similarly,  
316 Tiangong Kaiwu (天工開物, 1637 AD) mentioned that mungbean must be sown during July and  
317 August (Chinese text and translation in Supplementary note). The record suggests that the  
318 daylength requirement restricts the sowing period of mungbean in the north. Together with the

319 dry summer (Figure 3-figure supplement 4D) and soon-arriving autumn frost, there might be a  
320 strong selection favoring accessions with the rapid life cycle. These records suggest the  
321 phenotypic characteristics of northern accessions did not originate very recently, and the unique  
322 distribution of climatic zones in Asia resulted in not only the specific patterns of expansion but  
323 also the evolution of novel phenotypic characteristics in mungbean.

## 324 **Discussion**

325 Using mungbean as a test case, we combined population genomics, environmental niche  
326 modeling, empirical field and laboratory investigation, and ancient Chinese text analyses to  
327 demonstrate the importance of climatic adaptation in dictating the unique patterns of cultivation  
328 range expansion after domestication. In this study, we focus on how or when mungbean could be  
329 established as part of local agriculture throughout Asia. We showed that after leaving South Asia,  
330 mungbean was likely first cultivated in Southeast Asia, East Asia, and finally Central Asia. We  
331 acknowledge that our data do not allow us to specify the number of previous out-of-India events  
332 that did not leave traces in modern genetic data or their exact routes (for example, whether  
333 mungbean expanded from South to Southeast Asia through the land or maritime routes). While  
334 there might be multiple attempts to bring mungbean out of India as a commodity for consumption,  
335 our results suggest all present-day non-South-Asian accessions have a common out-of-India  
336 origin.

## 337 **The climate-driven spread route despite historical human activities**

338 Combining archeological records, population genetics, and niche modeling (Figure 2 and 3), our  
339 results suggest that after the early cultivation of mungbean in northwestern or southern South  
340 Asia (Fuller, 2007; Kingwell-Banham et al., 2015), the large environmental difference may  
341 restrict its northwards spread to Central Asia. Mungbean may first spread to eastern South Asia,  
342 and the subsequent expansion to Southeast Asia might be facilitated by the environmental  
343 similarity between these two regions. This is supported by archaeobotanical remains from the  
344 Thai-Malay Peninsula date to ca. 400-100 BCE (Castillo et al., 2016). It took more than five  
345 thousand generations until mungbean further spread to northeast Asia, again likely due to the  
346 environmental difference. The later appearance of mungbean in northern China is also supported  
347 by historical records. After that, the EA group spread across the northern part of Asia within a

348 few thousand generations. Our proposed route suggests that mungbean reached Central Asia at  
349 the latest, consistent with its absence from archeological sites in Central Asia, including  
350 Turkmenistan and Uzbekistan in the Chalcolithic and Bronze ages (5<sup>th</sup> to 2<sup>nd</sup> millennium BC)  
351 (Miller, 1999), Southeastern Kazakhstan in the Iron age dating 1<sup>st</sup> millennium BC (Spengler et  
352 al., 2017), and eastern Uzbekistan during the medieval period (800-1100 AD) (Spengler et al.,  
353 2018b). In addition, mungbean was only mentioned later by the 18<sup>th</sup> and early 19<sup>th</sup> centuries as a  
354 pulse grown in the Khiva region of Uzbekistan (Annanepesov and Bababekov, 2003).

355         In this study, we suggest that the ability to disperse may not be an essential factor  
356 restricting mungbean spread from South to Central Asia. Cultivated mungbean has lost the natural  
357 ability of pod shattering to disperse seeds, and they mostly traveled through landscapes by  
358 human-mediated seed exchange or commerce. Evidence of long-distance human-mediated  
359 dispersal of mungbean was available. For example, mungbean seeds have been found near the  
360 Red Sea coast of Egypt during the Roman (AD 1–250) period (Van der Veen and Morales, 2015).  
361 As early as about four kya, the Bactria–Margiana Archaeological Complex (BMAC) civilization  
362 north of the Hindu Kush had extensive contact with the Indus Valley Civilization (Dupuy, 2016;  
363 Kohl, 2007; Kohl and Lyonnet, 2008; Lamberg-Karlovsky, 2002; Lombard, 2020; Lyonnet,  
364 2005). By 1,500 BC, the “Trans-Eurasian Exchanges” of major cereal crops has happened (Liu  
365 et al., 2019). The frequent crop exchange is evidenced by archaeobotanical findings in the Barikot  
366 site (ca. 1200 BC-50 AD) in northern Pakistan (Spengler et al., 2021), where diverse crops were  
367 cultivated, including those from West Asia (wheat, barley, pea, and lentil), South Asia  
368 (urdbean/mungbean), and likely East Asia (rice). Despite this, in Bronze-age archeological sites  
369 north of Hindu Kush, legumes (such as peas and lentils) were observed to a lesser extent than  
370 cereals, and South Asian crops were not commonly found (Jeong et al., 2019; Spengler, 2015;  
371 Spengler et al., 2014a; Spengler et al., 2018a; Spengler et al., 2014b). Interestingly, archeologists  
372 suggested legume’s higher water requirement than cereals may be associated with this pattern,  
373 and pea and lentil’s role as winter crops in Southwest Asia may be associated with their earlier  
374 appearance in northern Central Asia than other legumes (Spengler et al., 2014a; Spengler et al.,  
375 2018a; Spengler et al., 2014b). Therefore, despite the possibility of human-mediated seed  
376 dispersal between South and Central Asia, our results and archeological evidence concurred that  
377 mungbean arrived in Central Asia at the latest, likely restricted by environmental adaptation.

## 378 **Local adaptation of mungbean genetic groups**

379 Despite the profound impact of human-mediated dispersal on the spread of these and many other  
380 crops (Herniter et al., 2020; Kistler et al., 2018), in mungbean we suggest adaptation to distinct  
381 climatic regimes to be an important factor in the establishment after dispersal. Mungbean is  
382 commonly grown under rainfed cultivation and depends on the residual moisture in the fields  
383 after the primary crop, thus responding to water stress (Douglas et al., 2020). In the south, a  
384 temperature range of 20-30°C and annual precipitation of 600-1,000 mm is optimal for mungbean  
385 (Ha and Lee, 2019). In Central Asia, however, the annual precipitation could be as low as 286  
386 mm, greatly below the lower limit required for the southern mungbean. This situation could be  
387 further exacerbated by the fact that mungbean might not be a highly valued crop under extensive  
388 care during cultivation. Indeed, the earliest record of mungbean in China (Qimin Yaoshu 齊民要  
389 術, 544 AD) emphasizes its use as green manure. In Central Asia, mungbean is a minor crop  
390 (Rani et al., 2018) grown with little input, only in the short duration between successive planting  
391 of main crops (which is also the dry season in Central Asia, Supplement file 12 and Figure 3-  
392 figure supplement 4) and using residual soil moisture with little irrigation. We suggest that the  
393 lack of extensive input subjects mungbean to more substantial local climatic challenges than  
394 highly valued high-input crops that receive intensive management, including irrigation. Therefore,  
395 the combination of climatic constraints and cultural usage, instead of physical barriers, may have  
396 shaped the historical spread route of the mungbean despite extensive human activities across the  
397 continent.

398 In addition to the constraint of soil moisture, other factors may have contributed to the  
399 selection of short-season accessions in the north. In the short summer seasons of much of Central  
400 Asia, short crop cycling is a requirement. In Uzbekistan, mungbean is often sown in early July  
401 after the winter wheat season and harvested before mid-October to avoid delays in the next round  
402 of winter wheat and escape frost damage. Therefore, fast-maturing accessions are essential for  
403 this production system (Rani et al., 2018). Similar rotation systems using mungbean to restore  
404 soil fertility during the short summer season after the harvest of the main crop were also  
405 mentioned in ancient Chinese sources (Chen, 1980). Mungbean is a short-day species from the  
406 south, and daylength likely limits the window when mungbean could be grown in the north:

407 Chinese texts during the 17<sup>th</sup> century (Tiangong Kaiwu 天工開物, 1637 AD) specifically  
408 mentioned the suitable duration to sow mungbean to control the flowering behavior for maximum  
409 yield (Supplementary note). Therefore, unlike in the south where yield appears to be an important  
410 selection target, the unique combination of daylength, agricultural practices, soil water  
411 availability, and frost damage in the north requires the selection for short-season accessions,  
412 likely limiting the direct adoption of southern accessions in the north. Consistent with this,  
413 Central Asian accessions have a faster life cycle potentially adaptive to both short growing season  
414 and reduced soil water availability, with reduced plant size and lower yield as tradeoffs. These  
415 accessions also have increased root:shoot ratio for drought adaptation, similar to findings in rice  
416 (Xu et al., 2015), alfalfa (Zhang et al., 2018), and chickpea (Kumar et al., 2012).

417         About accession sampling and climatic niche modeling, we recognize that not all samples  
418 have available spatial data, and we do not have samples from some parts of Asia. For example,  
419 while most samples of the SEA group were collected from Taiwan, Thailand, and Philippines,  
420 we do not have many samples from the supposed contact zone between SA and SEA (Bangladesh  
421 and Myanmar) or between SEA and EA (southern China). If more samples were available from  
422 these contact zones, the modeled niche space between SA and SEA and between SEA and EA  
423 would be even more similar than the current estimate, strengthening our hypothesis that niche  
424 similarity might facilitate the cultivation expansion. On the other hand, clear niche differentiation  
425 between SA and CA was evident despite the dense sampling near their contact zone. Based on  
426 the Köppen climate classification, South Asia could be roughly separated into two major zones,  
427 with the eastern zone slightly more similar to Southeast Asia (Figure 3-figure supplement 2). This  
428 partially explained the existence of some SEA accessions in the northeastern coast of India. While  
429 the SEA genetic group was named after the geographic region where most of its members were  
430 found in the present time, we recognize the possibility that it first occupied northeastern South  
431 Asia when it diverged from SA. In that case, the SA-SEA divergence time (4.7 to 11.3 thousand  
432 generations ago) might indicate the divergence between the two climate zones within South Asia  
433 rather than the expansion of mungbean into Southeast Asia, which may occur much later.

## 434 **Conclusion**

435 Our study demonstrates that mungbean's cultivation range expansion is associated with climatic  
436 conditions, which shaped the genetic diversity and contributed to adaptive differentiation among  
437 genetic groups. The climatic differences likely also resulted in farmers' differential emphasis on  
438 using it mainly as a grain or green manure crop, further intensifying the phenotypic diversification  
439 among regional mungbean accessions that could be used as an invaluable genetic resource for  
440 genetic improvement in the future.

## 441 **Materials and Methods**

### 442 **Plant materials and SNP genotyping**

443 A total of 290 cultivated mungbean (*V. radiata* var. *radiata*) accessions were provided by the  
444 Vavilov Institute (VIR). Most of the accessions are mainly landraces collected during 1910-1960  
445 are considered these accessions as oldest cultivated mungbean collection from VIR (Burlyaeva  
446 et al., 2019). The term landrace, as we use it here, refers to locally adaptive accessions coming  
447 from the countries traditionally cultivating them, which also lacks modern genetic improvement.  
448 The complete list of materials can be found in Supplementary file 1. Genomic DNA was extracted  
449 from a single plant per accession using the QIAGEN Plant Mini DNA kit according to the  
450 manufacturer's instruction with minor modification of pre-warming the AP1 buffer to 65°C and  
451 increasing the incubation time of the P3 buffer up to 2 hours on ice to increase DNA yield. DNA  
452 samples were sent to Diversity Arrays Technology Pty Ltd, Canberra, Australia for diversity array  
453 technology sequence (DArTseq) genotyping.

454 DArTseq data of 521 accessions from the Australian Diversity Panel (ADP) (Noble et al.,  
455 2018) and 297 accessions from the World Vegetable Center (WorldVeg) mini-core (Breria et al.,  
456 2020) were also included in this study. In total, our dataset contains more than one thousand  
457 accessions (1,092) and covers worldwide diversity of cultivated mungbean representing a wide  
458 range of variation in seed colour (Figure 1A). Sixteen wild mungbean (*V. radiata* var. *sublobata*)  
459 accessions were included as an outgroup. While all accessions used in this study have the country  
460 of origin information, only those from VIR have detailed longitude and latitude information.  
461 Therefore, for analyses connecting genetic information and detailed location (the isolation by  
462 distance analyses), only the VIR samples were used.



463 The major goal of this study is to investigate the patterns of population expansion and the  
464 underlying ecological causes instead of detailed haplotype analyses of specific genomic regions.  
465 For this goal, genomewide SNPs provide similar information as whole-genome sequencing, as  
466 have been shown in other species. Compared to other genotyping-by-sequencing technologies,  
467 DArTseq has the additional advantage of less missing data among loci or individuals, providing  
468 a more robust estimation of population structure.

#### 469 **SNP calling**

470 Trimmomatic version 0.38 (Bolger et al., 2014) was used to remove adapters based on the  
471 manufacturer's adapter sequences. Reads for each accession were trimmed for low-quality bases  
472 with quality scores of  $Q \leq 10$  using SolexaQA version 3.1.7.1 (Cox et al., 2010) and mapped to  
473 the mungbean reference genome (Vradiata\_ver6, (Kang et al., 2014) using the Burrows-Wheeler  
474 Aligner (BWA) version 0.7.15 (Li and Durbin, 2009). Reads were then sorted and indexed using  
475 samtools version 1.4.1 (Li et al., 2009). We used Genome Analysis Toolkit (GATK) version 3.7-  
476 0-gcfedb67 (McKenna et al., 2010) to call all sites, including variant and invariant sites. We  
477 obtained 1,247,721 sites with a missing rate of  $< 10\%$  and a minimum quality score of 30. SNP  
478 calling was performed using GATK (McKenna et al., 2010). Finally, we used VCFtools version  
479 0.1.13 (Danecek et al., 2011) to remove SNPs with more than two alleles and 10% missing data,  
480 resulting in 34,469 filtered SNPs. To reduce non-independence caused by linkage disequilibrium  
481 (LD) among SNPs, SNPs were pruned based on a 50-SNP window with a step of 5 SNPs and  $r^2$   
482 threshold of 0.5 in PLINK (Purcell et al., 2007). This dataset of 10,359 LD-pruned SNPs (10%  
483 missing data) was applied for all analyses related to population genomics unless otherwise noted.  
484 For TreeMix that require LD-pruned SNPs with no missing dataset, we used 4,396 LD-pruned  
485 SNPs with no missing data.

#### 486 **Population genetics and differentiation analyses**

487 Population structure was investigated based on 10,359 LD-pruned SNPs using ADMIXTURE  
488 (Alexander et al., 2009) with the number of clusters (K) ranging from 1 to 10. The analyses were  
489 run ten times for each K value, and cross-validation (CV) error was used to obtain the most  
490 probable K value for population structure analysis. ADMIXTURE plots were generated using  
491 "Pophelper" in R (Francis, 2017). Genetic groups of accessions were assigned based on ancestry  
492 coefficient  $Q \geq 0.7$ , otherwise the accession was considered admixed. The population structure



493 was also examined with principal component analysis (PCA). The neighbor-joining phylogenetic  
494 tree was calculated using TASSEL (Trait Analysis by aSSociation, Evolution and Linkage)  
495 software version 5.2.60 (Bradbury et al., 2007) and visualized using FigTree version 1.4.4  
496 (<http://tree.bio.ed.ac.uk/software/figtree/>).

497 The relationships and gene flow among the four inferred genetic groups were further  
498 assessed by TreeMix version 1.12 (Pickrell and Pritchard, 2012) using 4,396 LD-pruned SNPs  
499 with no missing data. The analysis was run for 0 to 3 migration events with *V. radiata* var.  
500 *sublobata* as an outgroup with a block size of 20 SNPs to account for the effects of LD between  
501 SNPs. We estimated one as the optimal number of migration events using the “OptM” in R (Fitak,  
502 2021). Bootstrap support for the resulting observed topology was obtained using 500 bootstrap  
503 replicates.

504 Nucleotide diversity ( $\pi$ ) and genetic differentiation ( $d_{xy}$  and  $F_{ST}$ ) were estimated in 10 kb  
505 windows with pixy version 1.2.7.beta1 (Korunes and Samuk, 2021) using all 1,247,721 invariant  
506 and variant sites. LD decay for each genetic group was estimated based on 34,469 non-LD-pruned  
507 SNPs using PopLDdecay (Zhang et al., 2019). The curves were fitted by a LOESS function and  
508 an LD decay plot was drawn using R.

509 To investigate the relation among inferred genetic groups,  $f_3$  and  $f_4$  statistics were  
510 computed based on filtered SNPs using ADMIXTOOLS version 7.0 (Patterson et al., 2012). The  
511  $f_3$  statistic compares allele frequencies in two populations (A, B) and a target population C. In  
512 “outgroup  $f_3$  statistic”, C is the outgroup and positive values represent the shared genetic drift  
513 between A and B. In “admixture  $f_3$  statistic”, negative values indicate that the C is admixed from  
514 A and B. For  $f_4$  statistics,  $f_4(A, B; C, D)$  measures the shared genetic drift between B populations  
515 and C and D after their divergence from outgroup A. A positive value indicates that the B  
516 population shares more alleles with D, and a negative value indicates that the B population shares  
517 more alleles with C. We used two Mb as a unit of block-jackknife resampling to compute standard  
518 errors. The Z-scores with absolute values greater than three are considered statistically significant.

519 To examine the role of geographic distance in shaping spatial genetic differentiation,  
520 Mantel tests with 1,000 permutations were performed for each of the ADMIXTURE-inferred  
521 genetic groups (separately for the groups defined by  $Q \geq 0.7$  or  $Q \geq 0.5$ ) using “ade4” in R.

522 Pairwise genetic distance between accessions was estimated based on all sites while the great  
523 circle geographic distance was determined using “fields” in R. In addition, the same analysis was  
524 conducted for southern and northern groups to examine if there was a south-north pattern of  
525 differentiation.

526 Based on the shape of the phylogenetic tree, we used fastsimcoal2 (Excoffier et al., 2021),  
527 which does not rely on whole-genome sequencing, to estimate the split time among genetic  
528 groups. Fifty accessions were randomly picked from each genetic group. Population size was  
529 allowed to change, and gene flow was allowed among populations. This analysis used all sites  
530 covered by the DArT tags (including monomorphic sites), and the mutation rate was set to  $1 \times 10^{-8}$   
531 which was within the range of mutation rates used in eudicots (Barrera-Redondo et al., 2021;  
532 Zheng et al., 2022). The models were run using unfolded site frequency spectrum using the major  
533 allele in the wild progenitor population (*V. radiata* var. *sublobata*) as the ancestral allele. The  
534 model was run independently 100 times, each with 100,000 simulations. After obtaining the run  
535 with the highest likelihood, we performed parametric bootstrapping 100 times to obtain the 75%  
536 confidence intervals of each parameter based on the previous study of Gutaker et al. (2020).

### 537 **Ecological niche modelling (ENM)**

538 To understand whether the habitats of genetic groups are differentiated, 248 sampling sites (82  
539 for East Asia, 45 for Southeast Asia, 49 for South Asia and 72 for Central Asia genetic groups),  
540 in combination with additional presence records obtained from the Global Biodiversity  
541 Information Facility (GBIF, <https://www.gbif.org/>), were used for the analysis. Using the  
542 longitude and latitude information, we extracted the Köppen climate zones (Köppen, 2011) using  
543 “kgc” in R (Bryant et al., 2017). After excluding zones with less than five samples, the remaining  
544 ten zones were grouped into six categories based on climate similarity: dry hot (BSh and BWh),  
545 dry cold (BSk and BWk), temperate dry summer (Csa), tropical savanna (Aw), Continental (Dwb  
546 and Dfb), and temperate wet summer (Cfa and Cwa). The former three are relatively dry  
547 environments.

548 Climate layers comprising monthly minimum, maximum, mean temperature,  
549 precipitation, and 19 bioclimatic variables were downloaded from the WorldClim database  
550 version 1.4 (Hijmans et al., 2005). All climate layers available from WorldClim were created

551 based on climate conditions recorded between 1960 and 1990 at a spatial resolution of 30 arc-  
552 seconds (approximately 1 km<sup>2</sup>). To minimize redundancy and model overfitting, pairwise Pearson  
553 correlations between the 19 bioclimatic variables were calculated using ENMTools version 1.4.4  
554 (Warren et al., 2010), excluding one of the two variables that has a correlation above 0.8  
555 (Supplementary file 6). As a result, eight bioclimatic variables were used for all further analyses,  
556 including Bio1 (annual mean temperature), Bio2 (mean diurnal range), Bio3 (isothermality), Bio8  
557 (mean temperature of wettest quarter), Bio12 (annual precipitation), Bio14 (precipitation of driest  
558 month), Bio15 (precipitation seasonality) and Bio19 (precipitation of coldest month). Bioclimatic  
559 variables were extracted for each occurrence point using “raster” in R (Hijmans, 2021). PCA and  
560 multivariate analysis of variance (MANOVA) were conducted to examine whether there was a  
561 significant habitat difference among genetic groups. Ecological niche modelling (ENM) was  
562 performed using MAXENT version 3.3.1 (Phillips et al., 2006) to predict the geographic  
563 distribution of suitable habitats for cultivated mungbean. The ENM analysis was run with a  
564 random seed, a convergence threshold of 5,000 and 10-fold cross-validation. As a measure of the  
565 habitat overlaps of the four genetic groups, pairwise of Schoener’s D was calculated using  
566 ENMTools. The value ranges from 0 (no niche overlap) to 1 (niche complete overlap). In addition,  
567 we carried out the same analyses using monthly temperature and precipitation from May, July,  
568 and September.

### 569 **Field evaluation**

570 Among the 52 accessions used for laboratory experiments, phenotyping of 49 accessions was  
571 conducted at WorldVeg, Taiwan in 1984 and 2018 and at Crop Sciences Institute, National  
572 Agricultural Research Centre, Pakistan in 2015. The traits related to phenology (days to 50%  
573 flowering), reproduction (100 seed weight, pod length, pods per plant, 1000 seed weight, seeds  
574 yield per plant, and seeds per pod), and plant size (petiole length, plant height, plant height at  
575 flowering, plant height at maturity, primary leaf length, primary leaf width, terminal leaflet length,  
576 and terminal leaflet width) were included. Trait values were inverse normal transformed.  
577 The analysis of variance (ANOVA) was performed to test for inferred genetic groups differences  
578 for each trait using R software (version 4.1.0).

### 579 **Drought phenotyping**

580 A total of 52 accessions with ancestry coefficients  $Q \geq 0.7$  from three genetic groups (Southeast  
581 Asia, South Asia, and Central Asia) were selected for experiments of seedling-stage drought  
582 response. The experiment was laid out in a completely randomized design with three replicates  
583 of each accession under two treatments (control/drought). The experiment was conducted in two  
584 independent batches, and the whole experiment included 624 plants (52 accessions x 2 treatments  
585 x 3 plants per treatment x 2 batches).

586 Mungbean seeds were surface-sterilized with 10% bleach for 10 mins and rinsed with  
587 distilled water for three times. Seeds were treated with 70% ethanol for 5 mins and washed three  
588 times in distilled water. The sterilized seeds were germinated on wet filter paper in petri dishes  
589 for 3 days. The experiment was conducted in a 740FLED-2D plant growth chamber (HiPoint,  
590 Taiwan) at a temperature of  $25 \pm 1^\circ\text{C}$  and 12 hours of photoperiod (light ratios of red: green: blue  
591 3: 1: 1) with light intensity  $350 \mu\text{mol m}^{-2}\text{s}^{-1}$  and relative humidity at  $60 \pm 5\%$ . The seedlings were  
592 then transplanted to a hydroponic system with half-strength Hoagland nutrient solution  
593 (Phytotechnology Laboratory, USA) and were grown for six days before drought stress started.  
594 The nutrient solution was changed on alternate days and the pH of the solution was adjusted to  
595 6.0 with 1M KOH or 1M HCl.

596 For drought treatment, seedlings of mungbean were exposed to polyethylene glycol  
597 (PEG)-induced drought stress for five days. The solution of PEG6000 with an osmotic potential  
598 of -0.6 MPa was prepared by adding PEG6000 (Sigma-Aldrich, Germany) to the nutrient solution  
599 according to Michel and Kaufmann (1973), and pH was also adjusted to 6.0. The seedlings grown  
600 with the nutrient solution under the same environmental conditions were considered as controls.

601 At the end of the experiment, plants were evaluated for shoot dry weight (SDW) and root  
602 dry weight (RDW), measured on digital balance after oven-drying at  $70^\circ\text{C}$  for 48 hours. All traits  
603 were analysed by mixed-model ANOVA with the treatment (control/drought) and the genetic  
604 group as fixed effects. The models included accessions as a random effect nested within genetic  
605 groups and a random effect of batches. Tukey's test was conducted to compare genetic groups.  
606 All statistics were performed using JMP v3.0.0 (SAS Institute, 2016).

## 607 **$Q_{ST}$ - $F_{ST}$ comparisons**

608 For each trait, quantitative trait divergence ( $Q_{ST}$ ) was calculated separately with respect to each  
609 treatment. Our root and shoot weight experiment used a selfed-progeny design, using the self-  
610 fertilized seeds from each accession as replicates, as recommended for partially inbred species  
611 (Goudet and Buchi, 2006). For the selfed-progeny design of inbred species, (Equation 1)  $Q_{ST} =$   
612  $V_B / (V_B + V_{Fam})$ , where  $V_B$  is the among-population variance component and  $V_{Fam}$  is the within-  
613 population among-family variance component (Goudet and Buchi, 2006). Variance components  
614 were estimated using a model with genetic groups, accessions nested within genetic groups, and  
615 batches as random factors. To accommodate the possibility that mungbean is not completely  
616 selfing, we also applied (Equation 2)  $Q_{ST} = (1 + f)V_B / ((1 + f)V_B + 2V_{AW})$  (Goudet and Buchi,  
617 2006), where  $f$  is the inbreeding coefficient (estimated by VCFtools as 0.8425),  $V_B$  is the among-  
618 population variance component, and  $V_{AW}$  is the additive genetic variance within genetic groups  
619 estimated by the kinship matrix using TASSEL software (Bradbury et al., 2007). The results and  
620 conclusions are similar to our previous version. The  $F_{ST}$  was calculated only using accessions in  
621 the phenotyping experiment.

## 622 **Acknowledgements**

623 We thank Chia-Yu Chen and Shang-Ying Tien for their assistance in sample preparation. C-RL  
624 was funded by 107-2923-B-002-004-MY3 and 110-2628-B-002-027 from the Ministry of  
625 Science and Technology, Taiwan. C-TT was funded by 107-2923-B-002-004-MY3 from the  
626 Ministry of Science and Technology, Taiwan. Y-PL was supported by 110-2313-B-125-001-  
627 MY3 from the Ministry of Science and Technology, Taiwan. RN and RS were funded by the  
628 Australian Center for International Agricultural Research (ACIAR) through the projects on  
629 International Mungbean Improvement Network (CIM-2014-079 and CROP-2019-144) and by  
630 the strategic long-term donors to the World Vegetable Center: Republic of China (Taiwan), UK  
631 aid from the UK government, United States Agency for International Development (USAID),  
632 Germany, Thailand, Philippines, Korea, and Japan. EBvW was supported by USDA Multistate  
633 Hatch NE1710. EBvW and MS were supported by Russian Scientific Fund Project No. 18-46-  
634 08001 and the Ministry of Science and Higher Education of the Russian Federation as part of  
635 World-class Research Center program: Advanced Digital Technologies (contract No. 075-15-  
636 2020-934 dated 17.11.2020). SN was supported by the Zumberge foundation.

## 637 **Data Availability**

638 Sequences generated in this study are available under NCBI BioProject PRJN809503. Accession  
639 names, GPS coordinates, and NCBI accession numbers of the Vavilov Institute accessions are  
640 available under Supplementary file 1. Plant trait data are available at Dryad  
641 <https://doi.org/10.5061/dryad.d7wm37q3h>. Sequences and accession information of the World  
642 Vegetable Centre mini-core and the Australian Diversity Panel collections were obtained from  
643 Breria et al. (2020) and Noble et al. (2018).

## 644 **References**

- 645 Alexander DH, Novembre J, Lange K. 2009. Fast model-based estimation of ancestry in unrelated  
646 individuals. *Genome Research* **19**:1655-1664. DOI:  
647 <https://doi.org/10.1101/gr.094052.109>
- 648 Annanepesov M, Bababekov HN. 2003. The khanates of khiva and kokand and the relations  
649 between the knanates and with other powers. In: Adle C, Habib I (Eds). *History of*  
650 *Civilizations of Central Asia, Volume 5: Development in Contrast, from the Sixteenth to*  
651 *the mid-Nineteenth Century*. Paris: UNESCO Publishing. p. 64-89.
- 652 Barrera-Redondo J, Sánchez-de la Vega G, Aguirre-Liguori JA, Castellanos-Morales G,  
653 Gutiérrez-Guerrero YT, Aguirre-Dugua X, Aguirre-Planter E, Tenailon MI, Lira-Saade  
654 R, Eguiarte LE. 2021. The domestication of *Cucurbita argyrosperma* as revealed by the  
655 genome of its wild relative. *Horticulture Research* **8**:109. DOI:  
656 <https://doi.org/10.1038/s41438-021-00544-9>
- 657 Bolger AM, Lohse M, Usadel B. 2014. Trimmomatic: a flexible trimmer for Illumina sequence  
658 data. *Bioinformatics* **30**:2114-2120. DOI: <https://doi.org/10.1093/bioinformatics/btu170>
- 659 Bradbury PJ, Zhang Z, Kroon DE, Casstevens TM, Ramdoss Y, Buckler ES. 2007. TASSEL:  
660 software for association mapping of complex traits in diverse samples. *Bioinformatics*  
661 **23**:2633-2635. DOI: <https://doi.org/10.1093/bioinformatics/btm308>
- 662 Breria CM, Hsieh CH, Yen J-Y, Nair R, Lin C-Y, Huang S-M, Noble TJ, Schafleitner R. 2020.  
663 Population structure of the world vegetable center mungbean mini core collection and  
664 genome-wide association mapping of loci associated with variation of seed coat luster.  
665 *Tropical Plant Biology* **13**:1-12. DOI: <https://doi.org/10.1007/s12042-019-09236-0>
- 666 Bryant C, Wheeler NR, Rubel F, French RH. (2017). kgc: Köppen-Geiger climatic zones.  
667 (Version R package version 1.0.0.2.). Retrieved from [https://CRAN.R-](https://CRAN.R-project.org/package=kgc)  
668 [project.org/package=kgc](https://CRAN.R-project.org/package=kgc)
- 669 Burlyaeva M, Vishnyakova M, Gurkina M, Kozlov K, Lee C-R, Ting C-T, Schafleitner R,  
670 Nuzhdin S, Samsonova M, von Wettberg E. 2019. Collections of mungbean [*Vigna*  
671 *radiata*] (L.) R. Wilczek] and urdbean [*V. mungo* (L.) Hepper] in Vavilov Institute (VIR):  
672 traits diversity and trends in the breeding process over the last 100 years. *Genetic*  
673 *Resources and Crop Evolution* **66**:767-781. DOI: [https://doi.org/10.1007/s10722-019-](https://doi.org/10.1007/s10722-019-00760-2)  
674 [00760-2](https://doi.org/10.1007/s10722-019-00760-2)



- 675 Castillo CC, Bellina B, Fuller DQ. 2016. Rice, beans and trade crops on the early maritime Silk  
676 Route in Southeast Asia. *Antiquity* **90**:1255-1269. DOI:  
677 <https://doi.org/10.15184/aqy.2016.175>
- 678 Chen L-T. 1980. A study of the systems of rotating crops in Chinese history 我國歷代輪種制度  
679 之研究. *Bulletin of the Institute of History and Philology* **51**:281-313.
- 680 Cox MP, Peterson DA, Biggs PJ. 2010. SolexaQA: At-a-glance quality assessment of Illumina  
681 second-generation sequencing data. *BMC Bioinformatics* **11**:485. DOI:  
682 <https://doi.org/10.1186/1471-2105-11-485>
- 683 Danecek P, Auton A, Abecasis G, Albers CA, Banks E, DePristo MA, Handsaker RE, Lunter G,  
684 Marth GT, Sherry ST, McVean G, Durbin R. 2011. The variant call format and VCFtools.  
685 *Bioinformatics* **27**:2156-2158. DOI: <https://doi.org/10.1093/bioinformatics/btr330>
- 686 Dela Vina AC, Tomooka N. 1994. Genetic diversity in mungbean [*Vigna radiata* (L.) Wilczek]  
687 based on two enzyme systems. *Philippine Journal of Crop Science* **19**:1-9.
- 688 Douglas C, Pratap A, Rao BH, Manu B, Dubey S, Singh P, Tomar R. 2020. Breeding Progress  
689 and Future Challenges: Abiotic Stresses. In: Nair R M, Schafleitner R, Lee S-H (Eds).  
690 *The Mungbean Genome*. Cham: Springer International Publishing. p. 81-96.
- 691 Dupuy PD. 2016. Bronze Age Central Asia. In: *The Oxford Handbook of Topics in Archaeology*:  
692 Oxford University Press.
- 693 Excoffier L, Marchi N, Marques DA, Matthey-Doret R, Gouy A, Sousa VC. 2021. fastsimcoal2:  
694 demographic inference under complex evolutionary scenarios. *Bioinformatics* **37**:4882-  
695 4885. DOI: <https://doi.org/10.1093/bioinformatics/btab468>
- 696 Fitak RR. 2021. OptM: estimating the optimal number of migration edges on population trees  
697 using Treemix. *Biology Methods and Protocols* **6**. DOI:  
698 <https://doi.org/10.1093/biomethods/bpab017>
- 699 Francis RM. 2017. pophelper: an R package and web app to analyse and visualize population  
700 structure. *Molecular ecology resources* **17**:27-32. DOI: [https://doi.org/10.1111/1755-  
701 0998.12509](https://doi.org/10.1111/1755-0998.12509)
- 702 Fuller DQ. 2007. Contrasting patterns in crop domestication and domestication rates: recent  
703 archaeobotanical insights from the old world. *Annals of Botany* **100**:903-924. DOI:  
704 <https://doi.org/10.1093/aob/mcm048>
- 705 Fuller DQ, Boivin N, Hoogervorst T, Allaby R. 2011. Across the Indian Ocean: the prehistoric  
706 movement of plants and animals. *Antiquity* **85**:544-558. DOI:  
707 10.1017/S0003598X00067934
- 708 Fuller DQ, Harvey EL. 2006. The archaeobotany of Indian pulses: identification, processing and  
709 evidence for cultivation. *Environmental Archaeology* **11**:219-246. DOI:  
710 <https://doi.org/10.1179/174963106x123232>
- 711 Goudet Jm, Buchi L. 2006. The effects of dominance, regular inbreeding and sampling design on  
712  $Q_{ST}$ , an estimator of population differentiation for quantitative traits. *Genetics* **172**:1337-  
713 1347. DOI: <https://doi.org/10.1534/genetics.105.050583>
- 714 Gutaker RM, Groen SC, Bellis ES, Choi JY, Pires IS, Bocinsky RK, Slayton ER, Wilkins O,  
715 Castillo CC, Negrão S, Oliveira MM, Fuller DQ, Guedes JAdA, Lasky JR, Purugganan  
716 MD. 2020. Genomic history and ecology of the geographic spread of rice. *Nature Plants*  
717 **6**:492-502. DOI: <https://doi.org/10.1038/s41477-020-0659-6>
- 718 Gwag J-G, Dixit A, Park Y-J, Ma K-H, Kwon S-J, Cho G-T, Lee G-A, Lee S-Y, Kang H-K, Lee  
719 S-H. 2010. Assessment of genetic diversity and population structure in mungbean. *Genes  
720 & Genomics* **32**:299-308. DOI: <https://doi.org/10.1007/s13258-010-0014-9>

- 721 Ha J, Lee S-H. 2019. Mung bean (*Vigna radiata* (L.) R. Wilczek) breeding. In: Al-Khayri J M,  
722 Jain S M, Johnson D V (Eds). *Advances in Plant Breeding Strategies: Legumes: Volume*  
723 *7*. Cham: Springer International Publishing. p. 371-407.
- 724 Ha J, Satyawati D, Jeong H, Lee E, Cho K-H, Kim MY, Lee S-H. 2021. A near-complete genome  
725 sequence of mungbean (*Vigna radiata* L.) provides key insights into the modern breeding  
726 program. *Plant Genome* **14**:e20121. DOI: <https://doi.org/10.1002/tpg2.20121>
- 727 Herniter IA, Muñoz-Amatriain M, Close TJ. 2020. Genetic, textual, and archeological evidence  
728 of the historical global spread of cowpea (*Vigna unguiculata* [L.] Walp.). *Legume Science*  
729 **2**:e57. DOI: <https://doi.org/10.1002/leg3.57>
- 730 Hijmans R. (2021). Raster: geographic data analysis and modeling (Version R package version  
731 3.4-13). Retrieved from <https://CRAN.R-project.org/package=raster>
- 732 Hijmans RJ, Cameron SE, Parra JL, Jones PG, Jarvis A. 2005. Very high resolution interpolated  
733 climate surfaces for global land areas. *International Journal of Climatology* **25**:1965-1978.  
734 DOI: <https://doi.org/10.1002/joc.1276>
- 735 Islam ASMF, Blair MW. 2018. Molecular characterization of mung bean germplasm from the  
736 USDA core collection using newly developed KASP-based SNP markers. *Crop Science*  
737 **58**:1659-1670. DOI: <https://doi.org/10.2135/cropsci2018.01.0044>
- 738 Jeong C, Balanovsky O, Lukianova E, Kahbatkyzy N, Flegontov P, Zaporozhchenko V, Immel  
739 A, Wang C-C, Ixan O, Khussainova E, Bekmanov B, Zaibert V, Lavryashina M,  
740 Pocheshkhova E, Yusupov Y, Agdzhoyan A, Koshel S, Bukin A, Nymadawa P,  
741 Turdikulova S, Dalimova D, Churnosov M, Skhalyakho R, Daragan D, Bogunov Y,  
742 Bogunova A, Shtrunov A, Dubova N, Zhabagin M, Yepiskoposyan L, Churakov V,  
743 Pislegin N, Damba L, Saroyants L, Dibirova K, Atramentova L, Utevska O, Idrisov E,  
744 Kamenshchikova E, Evseeva I, Metspalu M, Outram AK, Robbeets M, Djansugurova L,  
745 Balanovska E, Schiffels S, Haak W, Reich D, Krause J. 2019. The genetic history of  
746 admixture across inner Eurasia. *Nature Ecology & Evolution* **3**:966-976. DOI:  
747 <https://doi.org/10.1038/s41559-019-0878-2>
- 748 Jones H, Leigh FJ, Mackay I, Bower MA, Smith LMJ, Charles MP, Jones G, Jones MK, Brown  
749 TA, Powell W. 2008. Population-based resequencing reveals that the flowering time  
750 adaptation of cultivated barley originated east of the fertile crescent. *Molecular Biology*  
751 *and Evolution* **25**:2211-2219. DOI: <https://doi.org/10.1093/molbev/msn167>
- 752 Jones H, Lister DL, Cai D, Kneale CJ, Cockram J, Peña-Chocarro L, Jones MK. 2016. The trans-  
753 Eurasian crop exchange in prehistory: Discerning pathways from barley phylogeography.  
754 *Quaternary International* **426**:26-32. DOI: <https://doi.org/10.1016/j.quaint.2016.02.029>
- 755 Jones M, Hunt H, Lightfoot E, Lister D, Liu X, Motuzaitė-Matuzevičiūtė G. 2011. Food  
756 globalization in prehistory. *World Archaeology* **43**:665-675. DOI:  
757 <https://doi.org/10.1080/00438243.2011.624764>
- 758 Kang YJ, Kim SK, Kim MY, Lestari P, Kim KH, Ha BK, Jun TH, Hwang WJ, Lee T, Lee J,  
759 Shim S, Yoon MY, Jang YE, Han KS, Taepayoon P, Yoon N, Somta P, Tanya P, Kim  
760 KS, Gwag JG, Moon JK, Lee YH, Park BS, Bombarely A, Doyle JJ, Jackson SA,  
761 Schafleitner R, Srinives P, Varshney RK, Lee SH. 2014. Genome sequence of mungbean  
762 and insights into evolution within *Vigna* species. *Nature Communications* **5**:5443. DOI:  
763 <https://doi.org/10.1038/ncomms6443>
- 764 Kim SK, Nair RM, Lee J, Lee SH. 2015. Genomic resources in mungbean for future breeding  
765 programs. *Frontiers in Plant Science* **6**:626. DOI:  
766 <https://doi.org/10.3389/fpls.2015.00626>



- 767 Kingwell-Banham E, Petrie CA, Fuller DQ. 2015. Early agriculture in South Asia. In: Goucher  
768 C, Barker G (Eds). *The Cambridge World History: Volume 2: A World with Agriculture,*  
769 *12,000 BCE–500 CE* (Vol. 2). Cambridge: Cambridge University Press. p. 261-288.
- 770 Kistler L, Maezumi SY, Souza JGd, Przelomska NAS, Costa FM, Smith O, Loiseau H, Ramos-  
771 Madrigal J, Wales N, Ribeiro ER, Morrison RR, Grimaldo C, Prous AP, Arriaza B,  
772 Gilbert MTP, Freitas FdO, Allaby RG. 2018. Multiproxy evidence highlights a complex  
773 evolutionary legacy of maize in South America. *Science* **362**:1309-1313. DOI:  
774 <https://doi.org/doi:10.1126/science.aav0207>
- 775 Kohl PL. 2007. Entering a Sown World of Irrigation Agriculture – From the Steppes to Central  
776 Asia and Beyond: Processes of Movement, Assimilation, and Transformation into the  
777 “Civilized” World East of Sumer. In: Kohl P L (Ed). *The Making of Bronze Age Eurasia.*  
778 Cambridge: Cambridge University Press. p. 182-243.
- 779 Kohl PL, Lyonnet B. 2008. By land and by sea: The circulation of materials and peoples, ca.  
780 3500-1800 B.C. In: Olijdam E, Spoor R H (Eds). *Intercultural Relations between South*  
781 *and Southwest Asia. Studies in Commemoration of E.C.L. During Caspers (1934–1996).*  
782 *BAR International Series 1826.* Oxford: Archaeopress. p. 29-42.
- 783 Köppen W. 2011. The thermal zones of the Earth according to the duration of hot, moderate and  
784 cold periods and to the impact of heat on the organic world. *Meteorologische Zeitschrift*  
785 **20**:351-360. DOI: <https://doi.org/10.1127/0941-2948/2011/105>
- 786 Korunes KL, Samuk K. 2021. pixy: Unbiased estimation of nucleotide diversity and divergence  
787 in the presence of missing data. *Molecular Ecology Resources* **21**:1359-1368. DOI:  
788 <https://doi.org/10.1111/1755-0998.13326>
- 789 Kumar N, Nandwal AS, Waldia RS, Singh S, Devi S, Sharma KD, Kumar A. 2012. Drought  
790 tolerance in chickpea as evaluated by root characteristics, plant water status, membrane  
791 integrity and chlorophyll fluorescence techniques. *Experimental Agriculture* **48**:378-387.  
792 DOI: <https://doi.org/10.1017/S0014479712000063>
- 793 Lamberg-Karlovsky CC. 2002. Archaeology and language: The Indo-Iranians. *Current*  
794 *Anthropology* **43**:63-88. DOI: <https://doi.org/10.1086/324130>
- 795 Lee CR, Svardal H, Farlow A, Exposito-Alonso M, Ding W, Novikova P, Alonso-Blanco C,  
796 Weigel D, Nordborg M. 2017. On the post-glacial spread of human commensal  
797 *Arabidopsis thaliana*. *Nature Communications* **8**:14458. DOI:  
798 <https://doi.org/10.1038/ncomms14458>
- 799 Li H, Durbin R. 2009. Fast and accurate short read alignment with Burrows-Wheeler transform.  
800 *Bioinformatics* **25**:1754-1760. DOI: <https://doi.org/10.1093/bioinformatics/btp324>
- 801 Li H, Handsaker B, Wysoker A, Fennell T, Ruan J, Homer N, Marth G, Abecasis G, Durbin R,  
802 Subgroup GDP. 2009. The Sequence Alignment/Map format and SAMtools.  
803 *Bioinformatics* **25**:2078-2079. DOI: <https://doi.org/10.1093/bioinformatics/btp352>
- 804 Lin Y-P, Chen H-W, Yeh P-M, Anand SS, Lin J, Li J, Noble T, Nair R, Schafleitner R,  
805 Samsonova M, Bishop-von-Wettberg E, Nuzhdin S, Ting C-T, Lawn RJ, Lee C-R. 2022.  
806 Distinct selection signatures during domestication and improvement in crops: a tale of  
807 two genes in mungbean. *bioRxiv*. DOI: <https://doi.org/10.1101/2022.09.08.506689>
- 808 Lister DL, Jones H, Oliveira HR, Petrie CA, Liu X, Cockram J, Kneale CJ, Kovaleva O, Jones  
809 MK. 2018. Barley heads east: Genetic analyses reveal routes of spread through diverse  
810 Eurasian landscapes. *PLOS ONE* **13**:e0196652. DOI:  
811 <https://doi.org/10.1371/journal.pone.0196652>

- 812 Liu X, Jones PJ, Motuzaitė Matuzevičiūtė G, Hunt HV, Lister DL, An T, Przelomska N, Kneale  
813 CJ, Zhao Z, Jones MK. 2019. From ecological opportunism to multi-cropping: Mapping  
814 food globalisation in prehistory. *Quaternary Science Reviews* **206**:21-28. DOI:  
815 <https://doi.org/10.1016/j.quascirev.2018.12.017>
- 816 Lombard P. 2020. The Oxus civilization/BMAC and its interaction with the Arabian Gulf. A  
817 review of the evidences. In: Lyonnet; B, Dubova N (Eds). *The World of the Oxus*  
818 *Civilization, Routledge* p. 607-634.
- 819 Lyonnet B. 2005. Another possible interpretation of the Bactro-Margiana culture (BMAC) of  
820 Central Asia: The tin Trade. In: Jarrige C, Lefevre V (Eds). *South Asian Archaeology*  
821 *Vol. 1 Prehistory*: Paris: Editions Recherche sur les Civilisations. p. 191-200.
- 822 McKenna A, Hanna M, Banks E, Sivachenko A, Cibulskis K, Kernysky A, Garimella K,  
823 Altshuler D, Gabriel S, Daly M, DePristo MA. 2010. The Genome Analysis Toolkit: a  
824 MapReduce framework for analyzing next-generation DNA sequencing data. *Genome*  
825 *Research* **20**:1297-1303. DOI: <https://doi.org/10.1101/gr.107524.110>
- 826 Meyer RS, Purugganan MD. 2013. Evolution of crop species: genetics of domestication and  
827 diversification. *Nature Reviews Genetics* **14**:840-852. DOI:  
828 <https://doi.org/10.1038/nrg3605>
- 829 Michel BE, Kaufmann MR. 1973. The osmotic potential of polyethylene glycol 6000. *Plant*  
830 *Physiology* **51**:914-916. DOI: <https://doi.org/10.1104/pp.51.5.914>
- 831 Miller NF. 1999. Agricultural development in western Central Asia in the Chalcolithic and  
832 Bronze Ages. *Vegetation History and Archaeobotany* **8**:13-19. DOI:  
833 <https://doi.org/10.1007/BF02042837>
- 834 Mishra GP, Dikshit HK, Tripathi K, Aski MS, Pratap A, Dasgupta U, Nair RM, Gupta S. 2022.  
835 Mungbean Breeding. In: Yadava D K, Dikshit H K, Mishra G P, Tripathi S (Eds).  
836 *Fundamentals of Field Crop Breeding*. Singapore: Springer Nature Singapore. p. 1097-  
837 1149.
- 838 Nair R, Schreinemachers P. 2020. Global status and economic importance of mungbean. In: Nair  
839 R, Schafleitner R, Lee S-H (Eds). *The Mungbean Genome*. Berlin: Springer International  
840 Publishing. p. 1-8.
- 841 Noble TJ, Tao Y, Mace ES, Williams B, Jordan DR, Douglas CA, Mundree SG. 2018.  
842 Characterization of linkage disequilibrium and population structure in a mungbean  
843 diversity panel. *Frontiers in Plant Science* **8**:2102. DOI:  
844 <https://doi.org/10.3389/fpls.2017.02102>
- 845 Patterson N, Moorjani P, Luo Y, Mallick S, Rohland N, Zhan Y, Genschoreck T, Webster T,  
846 Reich D. 2012. Ancient admixture in human history. *Genetics* **192**:1065-1093. DOI:  
847 <https://doi.org/10.1534/genetics.112.145037>
- 848 Phillips SJ, Anderson RP, Schapire RE. 2006. Maximum entropy modeling of species geographic  
849 distributions. *Ecological Modelling* **190**:231-259. DOI:  
850 <https://doi.org/10.1016/j.ecolmodel.2005.03.026>
- 851 Pickrell JK, Pritchard JK. 2012. Inference of population splits and mixtures from genome-wide  
852 allele frequency data. *PLOS Genetics* **8**:e1002967. DOI:  
853 <https://doi.org/10.1371/journal.pgen.1002967>
- 854 Pratap A, Gupta S, Basu PS, Tomar R, Dubey S, Rathore M, Prajapati US, Singh P, Kumari G.  
855 2019. Towards development of climate smart mungbean: challenges and opportunities.  
856 In: Kole C (Ed). *Genomic Designing of Climate-Smart Pulse Crops*. Chamsford: Springer  
857 International Publishing. p. 235-264.

- 858 Purcell S, Neale B, Todd-Brown K, Thomas L, Ferreira MAR, Bender D, Maller J, Sklar P, de  
859 Bakker PIW, Daly MJ, Sham PC. 2007. PLINK: A tool set for whole-genome association  
860 and population-based linkage analyses. *The American Journal of Human Genetics*  
861 **81**:559-575. DOI: <https://doi.org/10.1086/519795>
- 862 Rani S, Schreinemachers P, Kuziyev B. 2018. Mungbean as a catch crop for dryland systems in  
863 Pakistan and Uzbekistan: A situational analysis. *Cogent Food & Agriculture* **4**:1499241.  
864 DOI: <https://doi.org/10.1080/23311932.2018.1499241>
- 865 Sandhu K, Singh A. 2021. Strategies for the utilization of the USDA mung bean germplasm  
866 collection for breeding outcomes. *Crop Science* **61**:422-442. DOI:  
867 <https://doi.org/10.1002/csc2.20322>
- 868 Sangiri C, Kaga A, Tomooka N, Vaughan D, Srinives P. 2007. Genetic diversity of the mungbean  
869 (*Vigna radiata*, Leguminosae) genepool on the basis of microsatellite analysis. *Australian*  
870 *Journal of Botany* **55**:837-847. DOI: <https://doi.org/10.1071/BT07105>
- 871 Sokolkova A, Burlyayeva M, Valiannikova T, Vishnyakova M, Schafleitner R, Lee C-R, Ting C-  
872 T, Nair RM, Nuzhdin S, Samsonova M, von Wettberg E. 2020. Genome-wide association  
873 study in accessions of the mini-core collection of mungbean (*Vigna radiata*) from the  
874 World Vegetable Gene Bank (Taiwan). *BMC Plant Biology* **20**:363. DOI:  
875 <https://doi.org/10.1186/s12870-020-02579-x>
- 876 Spengler RN. 2015. Agriculture in the Central Asian Bronze Age. *Journal of World Prehistory*  
877 **28**:215-253. DOI: <https://doi.org/10.1007/s10963-015-9087-3>
- 878 Spengler RN, Cerasetti B, Tengberg M, Cattani M, Rouse LM. 2014a. Agriculturalists and  
879 pastoralists: Bronze Age economy of the Murghab alluvial fan, southern Central Asia.  
880 *Vegetation History and Archaeobotany* **23**:805-820. DOI:  
881 <https://doi.org/10.1007/s00334-014-0448-0>
- 882 Spengler RN, de Nigris I, Cerasetti B, Carra M, Rouse LM. 2018a. The breadth of dietary  
883 economy in Bronze Age Central Asia: Case study from Adjı Kui 1 in the Murghab region  
884 of Turkmenistan. *Journal of Archaeological Science: Reports* **22**:372-381. DOI:  
885 <https://doi.org/10.1016/j.jasrep.2016.03.029>
- 886 Spengler RN, Frachetti MD, Doumani PN. 2014b. Late Bronze Age agriculture at Tasbas in the  
887 Dzhungar Mountains of eastern Kazakhstan. *Quaternary International* **348**:147-157. DOI:  
888 <https://doi.org/10.1016/j.quaint.2014.03.039>
- 889 Spengler RN, Maksudov F, Bullion E, Merkle A, Hermes T, Frachetti M. 2018b. Arboreal crops  
890 on the medieval Silk Road: Archaeobotanical studies at Tashbulak. *PLOS ONE*  
891 **13**:e0201409. DOI: <https://doi.org/10.1371/journal.pone.0201409>
- 892 Spengler RN, Miller NF, Neef R, Tourtellotte PA, Chang C. 2017. Linking agriculture and  
893 exchange to social developments of the Central Asian Iron Age. *Journal of*  
894 *Anthropological Archaeology* **48**:295-308. DOI:  
895 <https://doi.org/10.1016/j.jaa.2017.09.002>
- 896 Spengler RN, Tang L, Nayak A, Boivin N, Olivieri LM. 2021. The southern Central Asian  
897 mountains as an ancient agricultural mixing zone: new archaeobotanical data from  
898 Barikot in the Swat valley of Pakistan. *Vegetation History and Archaeobotany* **30**:463-  
899 476. DOI: <https://doi.org/10.1007/s00334-020-00798-8>
- 900 Stevens CJ, Murphy C, Roberts R, Lucas L, Silva F, Fuller DQ. 2016. Between China and South  
901 Asia: A Middle Asian corridor of crop dispersal and agricultural innovation in the Bronze  
902 Age. *The Holocene* **26**:1541-1555. DOI: <https://doi.org/10.1177/0959683616650268>

- 903 Takahashi Y, Kongjaimun A, Muto C, Kobayashi Y, Kumagai M, Sakai H, Satou K, Teruya K,  
904 Shiroma A, Shimoji M, Hirano T, Isemura T, Saito H, Baba-Kasai A, Kaga A, Somta P,  
905 Tomooka N, Naito K. 2020. Same locus for non-shattering seed pod in two independently  
906 domesticated legumes, *Vigna angularis* and *Vigna unguiculata*. *Frontiers in Genetics*  
907 **11**:748. DOI: <https://doi.org/10.3389/fgene.2020.00748>
- 908 The 1001 Genomes Consortium. 2016. 1,135 Genomes reveal the global pattern of polymorphism  
909 in *Arabidopsis thaliana*. *Cell* **166**:481-491. DOI:  
910 <https://doi.org/10.1016/j.cell.2016.05.063>
- 911 Tomooka N, Lairungreang C, Nakeeraks P, Egawa Y, Thavarasook C. 1992. Center of genetic  
912 diversity and dissemination pathways in mung bean deduced from seed protein  
913 electrophoresis. *Theoretical and Applied Genetics* **83**:289-293. DOI:  
914 <https://doi.org/10.1007/BF00224273>
- 915 Van der Veen M, Morales J. 2015. The Roman and Islamic spice trade: New archaeological  
916 evidence. *Journal of Ethnopharmacology* **167**:54-63. DOI:  
917 <https://doi.org/10.1016/j.jep.2014.09.036>
- 918 Vir R, Lakhanpaul S, Malik S, Umdale S, Bhat KV. 2016. Utilization of germplasm for the  
919 genetic improvement of mung bean [*Vigna radiata* (L.) Wilczek]: The constraints and the  
920 opportunities. In: Rajpal V R, Rao S R, Raina S N (Eds). *Gene Pool Diversity and Crop*  
921 *Improvement: Volume I*. Cham: Springer International Publishing. p. 367-391.
- 922 Warren DL, Glor RE, Turelli M. 2010. ENMTools: a toolbox for comparative studies of  
923 environmental niche models. *Ecography* **33**:607-611. DOI:  
924 <https://doi.org/10.1111/j.1600-0587.2009.06142.x>
- 925 Xu W, Cui K, Xu A, Nie L, Huang J, Peng S. 2015. Drought stress condition increases root to  
926 shoot ratio via alteration of carbohydrate partitioning and enzymatic activity in rice  
927 seedlings. *Acta Physiologiae Plantarum* **37**:9. DOI: <https://doi.org/10.1007/s11738-014-1760-0>
- 928
- 929 Zhang C, Dong SS, Xu JY, He WM, Yang TL. 2019. PopLDdecay: a fast and effective tool for  
930 linkage disequilibrium decay analysis based on variant call format files. *Bioinformatics*  
931 **35**:1786-1788. DOI: <https://doi.org/10.1093/bioinformatics/bty875>
- 932 Zhang C, Shi S, Wang B, Zhao J. 2018. Physiological and biochemical changes in different  
933 drought-tolerant alfalfa (*Medicago sativa* L.) varieties under PEG-induced drought stress.  
934 *Acta Physiologiae Plantarum* **40**:25. DOI: <https://doi.org/10.1007/s11738-017-2597-0>
- 935 Zheng X, Wang T, Cheng T, Zhao L, Zheng X, Zhu F, Dong C, Xu J, Xie K, Hu Z, Yang L, Diao  
936 Y. 2022. Genomic variation reveals demographic history and biological adaptation of the  
937 ancient relictual, lotus (*Nelumbo Adans.*). *Horticulture Research* **9**:uhac029. DOI:  
938 <https://doi.org/10.1093/hr/uhac029>
- 939

940 **Supplementary note.** Text analysis and translation of ancient Chinese texts regarding  
941 mungbean

942

943 Qimin Yaoshu (齊民要術, about 544 AD)

944 Qimin Yaoshu, compiled by Sixie Jia (賈思勰), is one of the earliest and most complete  
945 agricultural sources in China, detailing agricultural techniques near the lower reaches of Yellow  
946 River at that era. This is the earliest record of mungbean in China, demonstrating mungbean has  
947 reached northern China at that time and is consistent with our estimates of population divergence  
948 time. The popularity of mungbean is demonstrated by it being mentioned multiple times under  
949 different contexts, most notably as a green manure:

950 「若糞不可得者，五六月中，概種菘豆，至七月、八月，犁掩殺之。如以糞糞田，  
951 則良美與糞不殊，又省功力。」

952 Translation: “Should feces be unavailable, during May and June one could grow mungbean.  
953 Until July or August, one could plow mungbean plants into the soil. This is equivalent to using  
954 feces to manure the land. This is as good as using feces and saves efforts.”

955 Notice that the months used in ancient China are slightly different from the Gregorian  
956 calendar.

957

958 Xiangshan Yelu (湘山野錄, 1068-1077 AD)

959 Xiangshan Yelu was written by a monk, Wen-Ying (文瑩), recording anecdotes during  
960 that era. Its records about the Emperor Zhenzong of Song (宋真宗, 968-1022 AD) detailed the  
961 phenotypes of Indian mungbean at that time:

962 「真宗深念稼穡，聞占城稻耐旱、西天綠豆子多而粒大，各遣使以珍貨求其種。占  
963 城得種二十石，至今在處播之。西天中印土得菘豆種二石，不知今之菘豆是否？」

964 Translation: “Zhenzong of Song deeply concerned about agriculture. He heard Champa rice  
965 being drought tolerant and mungbean from India produce numerous and large seeds. Diplomats  
966 were sent to exchange the seeds with treasure. Twenty dans of Champa rice were obtained and  
967 propagated everywhere. Two dans of mungbean were obtained from India, but it is unclear  
968 whether the mungbean today descended from these.”

969 “Dan” (石) is a unit of volume in ancient China and is called “Koku” in Japanese. The  
970 exact amount varied with time.



971           The texts provide us with two pieces of important information. First, mungbean from  
972 South Asia (likely also includes the SEA genetic groups if accessions near eastern India and  
973 Bangladesh were included) at that time had higher yield and larger seeds than native mungbean  
974 accessions in northern China, consistent with our results on trait divergence. Second, compared  
975 to the clear success of Champa rice in China, it was unclear whether those southern accessions  
976 had prospered in northern China, likely suggesting an unsuccessful introduction of southern high-  
977 yield and large-seeded accessions to the north.

978

979   Tiangong Kaiwu (天工開物, 1637 AD)

980           Tiangong Kaiwu is a famous Chinese encyclopedia compiled by Song Yingxing (宋應  
981 星). While it mostly covers technologies at that time, a section about agricultural practices covers  
982 mungbean:

983           「綠豆必小暑方種，未及小暑而種，則其苗蔓延數尺，結莢甚稀。若過期至於處  
984 暑，則隨時開花結莢，顆粒亦少。」

985           Translation: “Mungbean must be sown at or after Xiaoshu (Gregorian 7-8 July). Being  
986 sown before Xiaoshu, mungbean stems would spread for meters with few pods set. Being sown  
987 as late as Chushu (Gregorian 23-24 August), the plants would flower and set pods at any time,  
988 also with low yield.”

989           As a short-day plant, being sown too early when the days are too long, mungbean would  
990 have mostly vegetative growth. Being sown too late when the days are too short, flowering would  
991 be induced too quickly before sufficient vegetative development. In addition to our results that  
992 short-season accessions were favored in the north due to the requirement for drought escape, this  
993 source provides us with another support that mungbean could only be sown in a narrow time  
994 window due to daylength requirement. Given the autumn frost damage in the north, not being  
995 able to be sown earlier restricts the growing season length in the north, limiting the adoption of  
996 southern long-season accessions.

997

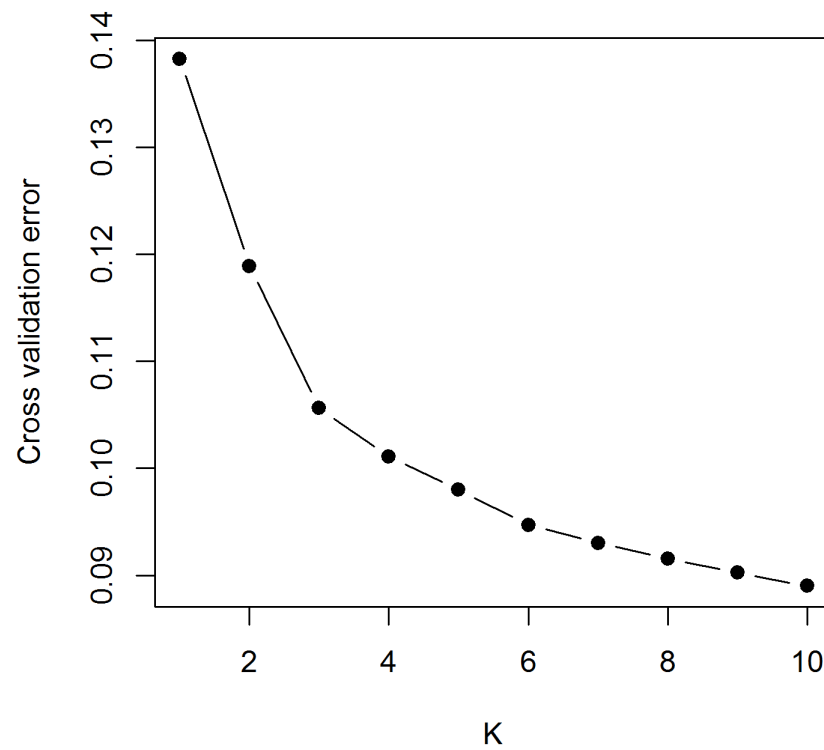

998 **Figure 1-figure supplement 1.** Cross-validation (CV) errors of ADMIXTURE. Means of CV errors  
999 were calculated based on K values ranging 1 to 10 with 10 independent runs.

1000

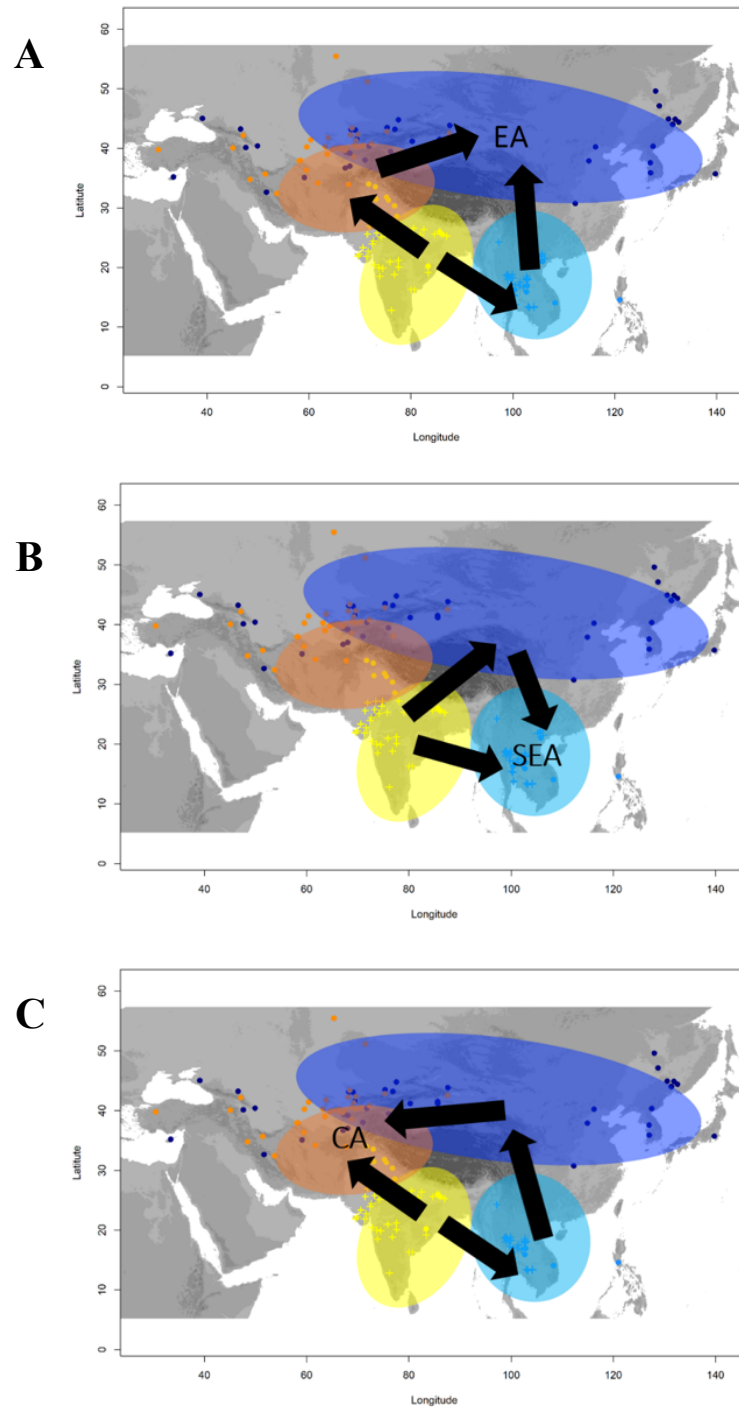

1001 **Figure 2-figure supplement 1.** Schematic representation to investigate presence of admixture in  
1002 a target population from two source populations using admixture  $f_3$ -statistics. (A)  $f_3(\text{EA}; \text{SEA},$   
1003  $\text{CA})$ , (B)  $f_3(\text{SEA}; \text{SA}, \text{EA})$  and (C)  $f_3(\text{CA}; \text{EA}, \text{SA})$ . Coloured circles indicate the geographic  
1004 area occupied by distinct genetic groups. Arrows indicates the possible direction of expansion  
1005 and admixture among populations.

1006



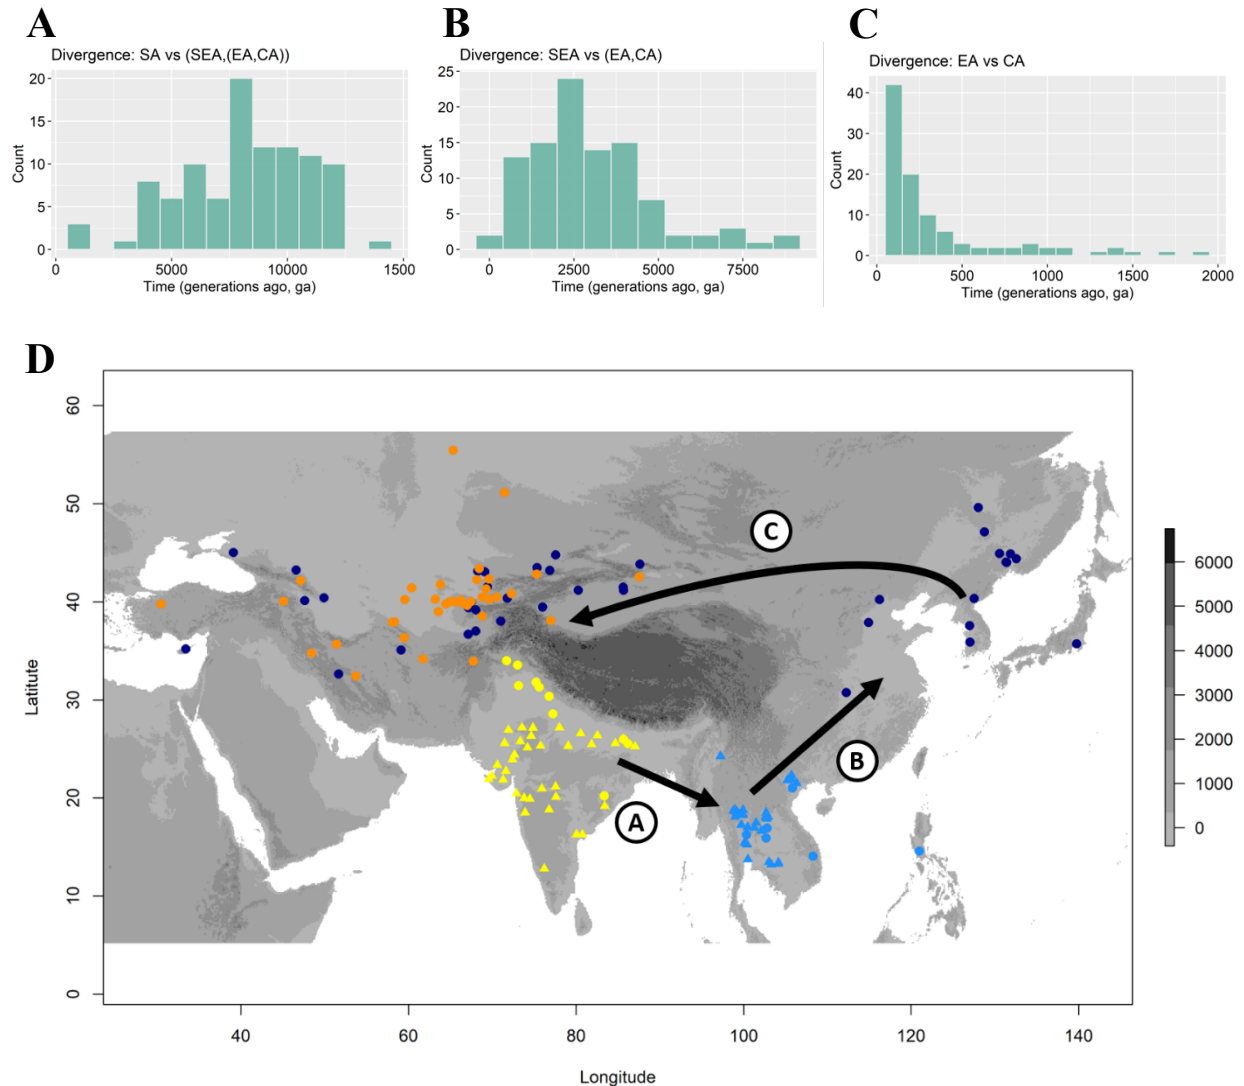

1007 **Figure 2-figure supplement 2.** Estimates of divergence time and inferred mungbean movement  
1008 over time across Asia. The histograms of the divergence times represent (A) split time between  
1009 SA and (SEA,(EA,CA)), (B) split time between SEA and (EA,CA), and (C) split time between  
1010 EA and CA. (D) Geographic distribution of mungbean accessions and proposed mungbean spread  
1011 routes. Exact locations for VIR accessions (filled circle) and GBIF records (filled triangle) are  
1012 provided. Each accession was coloured the same as an inferred genetic group using  
1013 ADMIXTURE in Figure 1. Arrow indicates the possible expansion directions. The map was  
1014 shaded as a gray colour representing altitude (meters above sea level).  
1015

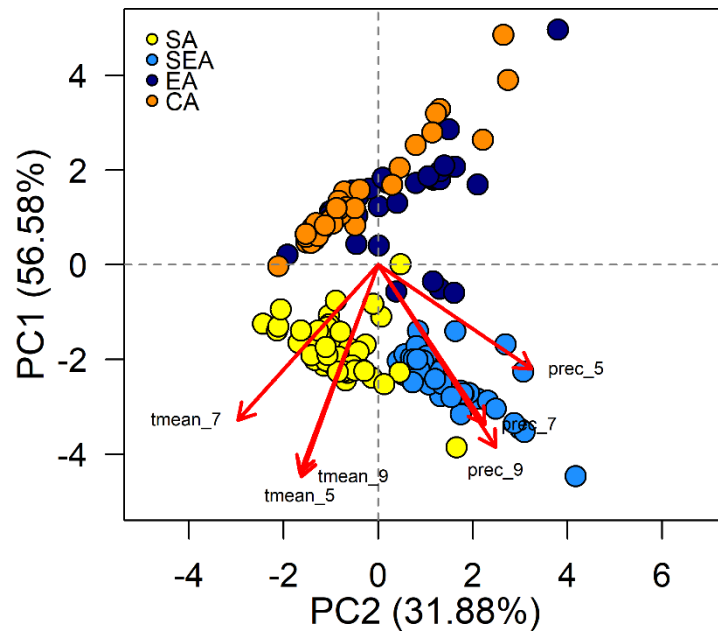

1016 **Figure 3-figure supplement 1.** Principal component analysis (PCA) of the growing season  
1017 climatic data including temperature and precipitation of May, July and September. Samples are  
1018 coloured according to four inferred genetic groups, as indicated in the legend.

1019

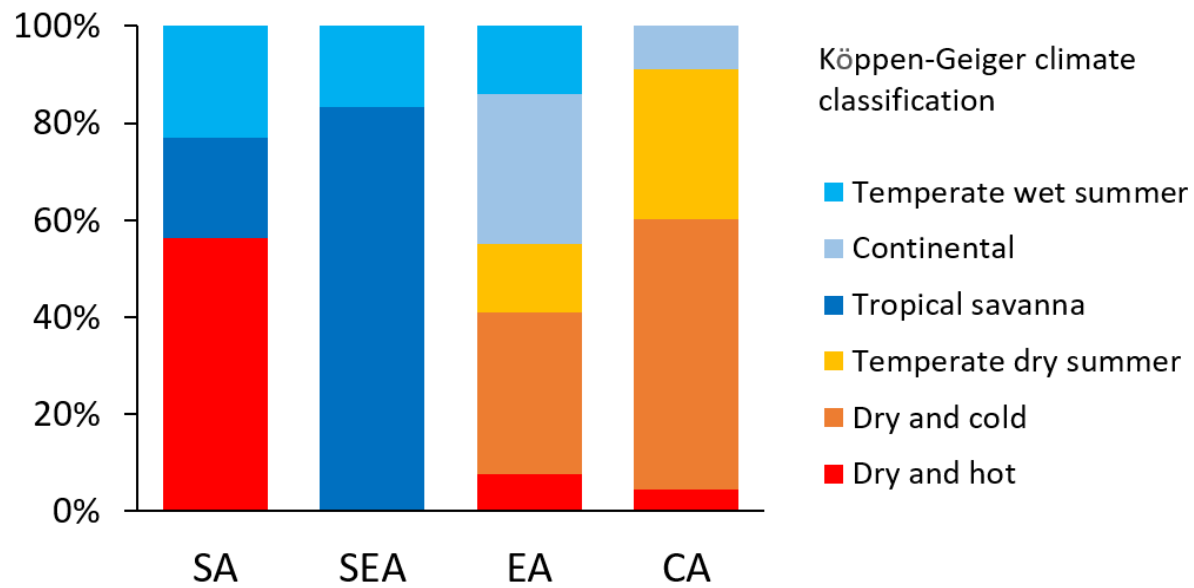

1020 **Figure 3-figure supplement 2.** The distribution of accessions in major climate zones according  
1021 to the Köppen climate classification (Köppen, 2011).  
1022

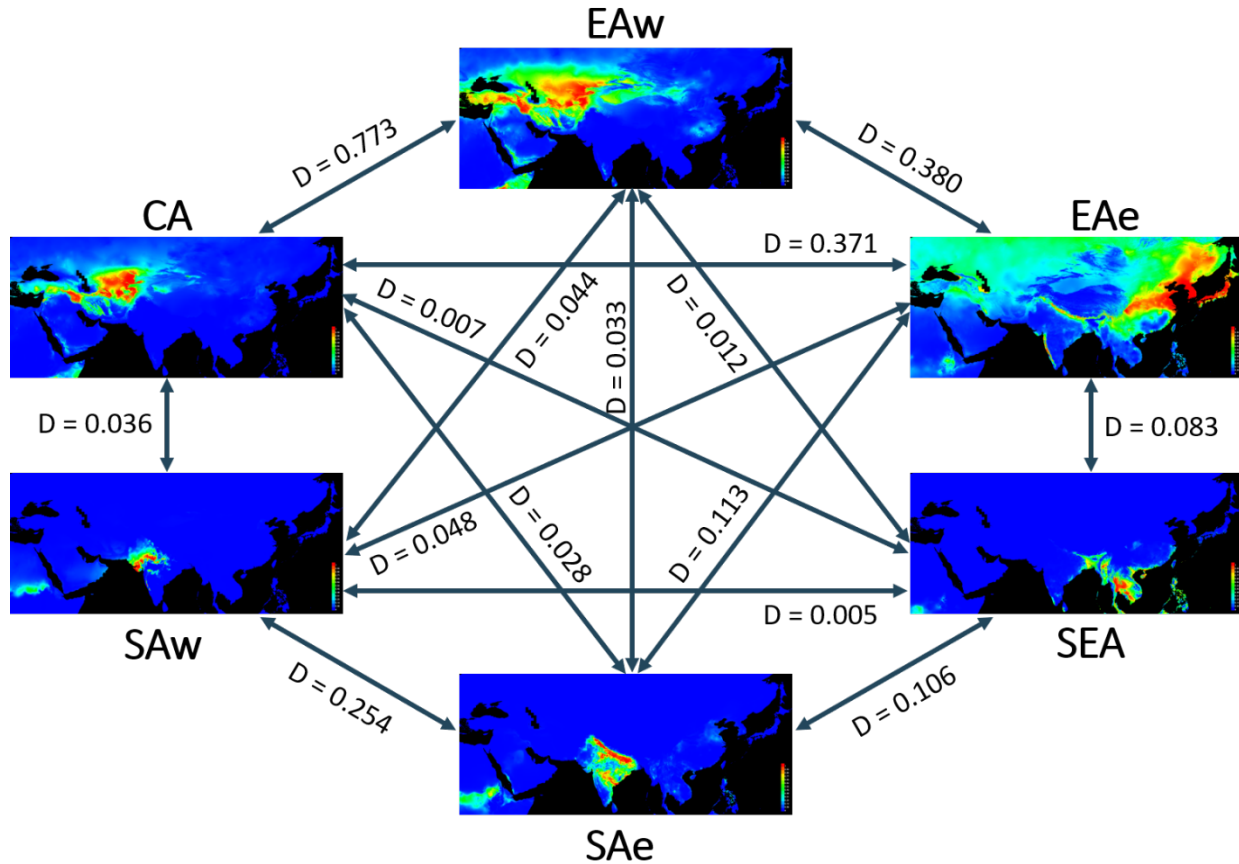

1023 **Figure 3-figure supplement 3.** Predicted distributions of six groups based on monthly  
1024 temperature and precipitation (May, July and September) during the summer growing season.  
1025 Red colour indicates high suitability and blue indicates low suitability. Values between groups  
1026 represent niche overlap measured using Schoener's D. Abbreviations: SAw: South Asia (west),  
1027 SAe: South Asia (east); SEA: Southeast Asia; EAe: East Asia (east); EAw: East Asia (west) and  
1028 CA: Central Asia.

1029

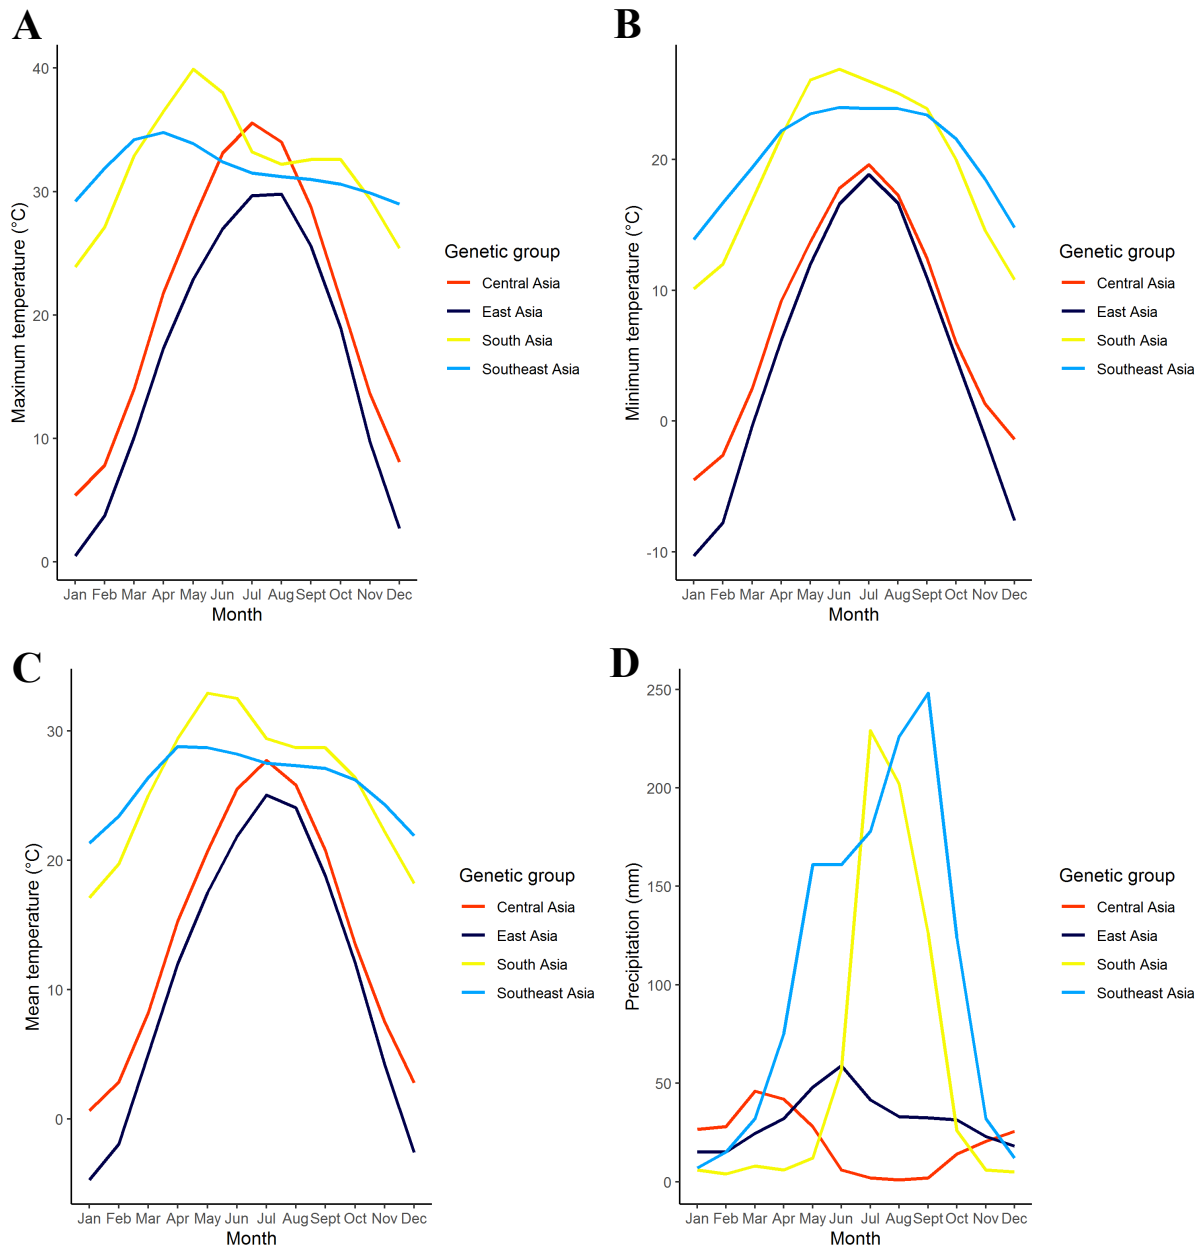

1030 **Figure 3-figure supplement 4.** Monthly temperature and precipitation variations among the four  
1031 genetic groups. Monthly (A) maximum temperature, (B) minimum temperature, (C) mean  
1032 temperature and (D) precipitation were computed based on median value among all accessions  
1033 of a group. Genetic group were coloured the same as in Figure. 1.

1034

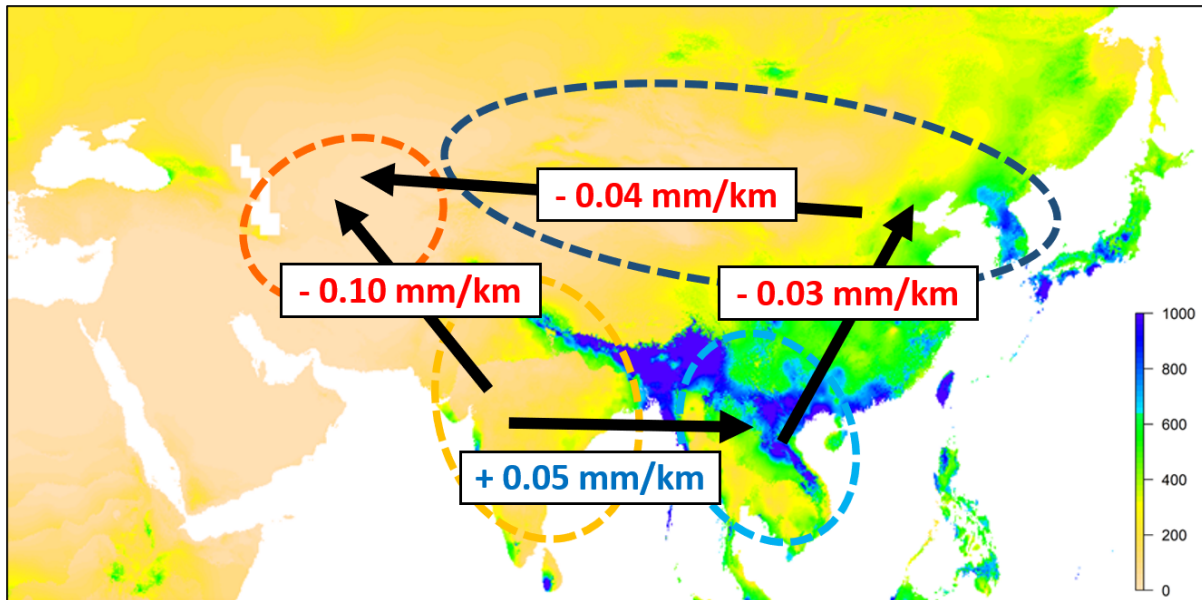

1035 **Figure 3-figure supplement 5.** Environmental gradient across Asia. The value on each arrow  
1036 indicates a change in mean precipitation for May, July and September (growth season) per  
1037 kilometer. The background map is colored according to summer precipitation (Bio18,  
1038 precipitation of warmest quarter, in mm).

1039

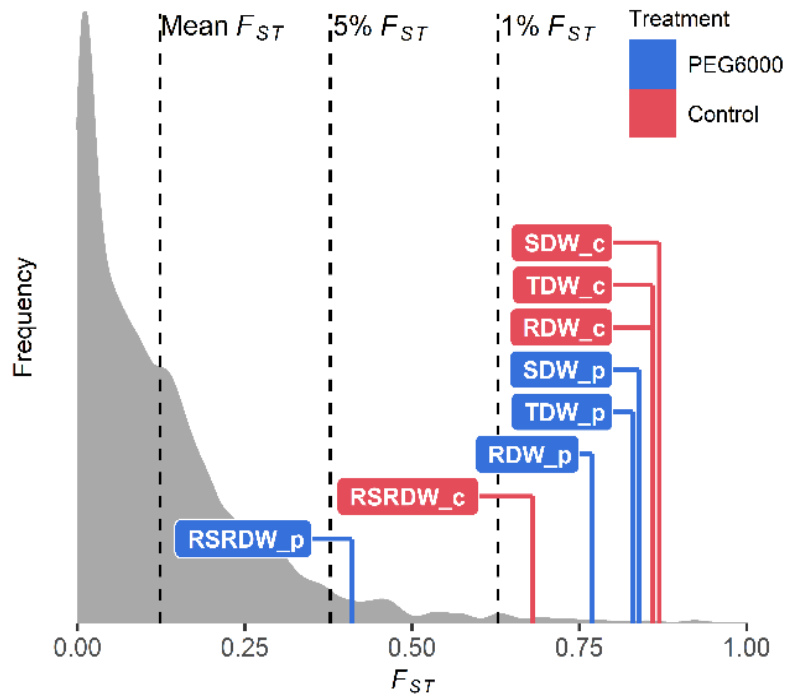

1040 **Figure 3-figure supplement 6.** Comparison of  $Q_{ST}$ - $F_{ST}$  for four drought-related traits under two  
1041 environments.  $F_{ST}$  values (mean, 5% and 1%) were indicated by black dashed lines. The  $Q_{ST}$  for  
1042 each trait was colored according to treatment and was calculated as Equation 1 in Materials and  
1043 Methods. Abbreviations: RDW: root dry weight; SDW: shoot dry weight; TDW: total dry weight;  
1044 RSRDW: root:shoot ratio dry weight; c: control; p: PEG6000.

1045



1046 **Supplementary file 1.** Mungbean accessions from Vavilov Institute (VIR) collection  
 1047

| <b>Sample name</b> | <b>Country</b>                   | <b>Latitude</b> | <b>Longitude</b> | <b>NCBI SRA accession</b> | <b>NCBI Biosample accession</b> |
|--------------------|----------------------------------|-----------------|------------------|---------------------------|---------------------------------|
| 1.B                | USA                              | NA              | NA               | SRR18125483               | SAMN26179197                    |
| 100.A              | Cyprus                           | 35.1856         | 33.3823          | SRR18125482               | SAMN26179198                    |
| 101.A              | Morocco                          | 33.9716         | -6.8498          | SRR18125266               | SAMN26179199                    |
| 102.A              | Israel                           | 32.4971         | 35.4973          | SRR18125200               | SAMN26179200                    |
| 103.A              | Indonesia                        | -6.5971         | 106.806          | SRR18125367               | SAMN26179201                    |
| 104.B              | Russia                           | 44.9003         | 131.8351         | SRR18125356               | SAMN26179202                    |
| 105.A              | Chile                            | -36.8305        | -73.1167         | SRR18125345               | SAMN26179203                    |
| 106.A              | India                            | 22.5587         | 88.2911          | SRR18125298               | SAMN26179204                    |
| 107.A              | India                            | 22.5726         | 88.3639          | SRR18125287               | SAMN26179205                    |
| 108.A              | India                            | 25.9821         | 85.6486          | SRR18125276               | SAMN26179206                    |
| 109.A              | Italy                            | 41.9028         | 12.4964          | SRR18125481               | SAMN26179207                    |
| 10A                | China                            | 47.1216         | 128.7382         | SRR18125398               | SAMN26179208                    |
| 110.B              | Portugal                         | 38.7223         | -9.1393          | SRR18125387               | SAMN26179209                    |
| 111.A              | Portugal                         | 38.7223         | -9.1393          | SRR18125376               | SAMN26179210                    |
| 112.A              | Russia                           | 45.0347         | 39.0978          | SRR18125329               | SAMN26179211                    |
| 113.A              | Tajikistan                       | 40.2675         | 69.6453          | SRR18125318               | SAMN26179212                    |
| 114.B              | India                            | 31.5204         | 74.3587          | SRR18125307               | SAMN26179213                    |
| 115.B              | India                            | 31.5204         | 74.3587          | SRR18125476               | SAMN26179214                    |
| 116.A              | Russia                           | 49.6152         | 127.9945         | SRR18125465               | SAMN26179215                    |
| 116.B              | Russia                           | 49.6152         | 127.9945         | SRR18125454               | SAMN26179216                    |
| 117.B              | Russia                           | 44.0281         | 131.3273         | SRR18125264               | SAMN26179217                    |
| 118.A              | Russia                           | 44.0118         | 131.3835         | SRR18125253               | SAMN26179218                    |
| 119.A              | Russia                           | 44.39           | 132.558          | SRR18125242               | SAMN26179219                    |
| 11A                | China                            | 47.1216         | 128.7382         | SRR18125231               | SAMN26179220                    |
| 120.A              | Argentina                        | -32.8895        | -68.8458         | SRR18125434               | SAMN26179221                    |
| 122.A              | Japan                            | 31.5969         | 130.5571         | SRR18125423               | SAMN26179222                    |
| 123.B              | Kyrgyzstan                       | 55.4649         | 65.3054          | SRR18125412               | SAMN26179223                    |
| 124.B              | Ethiopia                         | 12.9545         | 36.1573          | SRR18125223               | SAMN26179224                    |
| 125.A              | China                            | 42.5246         | 87.5396          | SRR18125212               | SAMN26179225                    |
| 126.A              | China                            | 42.5246         | 87.5396          | SRR18125201               | SAMN26179226                    |
| 127.A              | China                            | 42.5246         | 87.5396          | SRR18125199               | SAMN26179227                    |
| 128.A              | Democratic Republic of the Congo | 1.9293          | 30.0492          | SRR18125198               | SAMN26179228                    |
| 128.B              | Democratic Republic of the Congo | 1.9293          | 30.0492          | SRR18125197               | SAMN26179229                    |
| 129.A              | Korea                            | 37.5665         | 126.978          | SRR18125196               | SAMN26179230                    |
| 12A                | China                            | 47.1216         | 128.7382         | SRR18125195               | SAMN26179231                    |

|       |                |          |          |             |              |
|-------|----------------|----------|----------|-------------|--------------|
| 13.A  | Iran           | 32.4279  | 53.688   | SRR18125194 | SAMN26179232 |
| 130.A | Korea          | 37.5665  | 126.978  | SRR18125371 | SAMN26179233 |
| 131.A | Korea          | 37.5665  | 126.978  | SRR18125370 | SAMN26179234 |
| 132.B | Korea          | 40.3399  | 127.5101 | SRR18125369 | SAMN26179235 |
| 133.A | Korea          | 40.3399  | 127.5101 | SRR18125368 | SAMN26179236 |
| 134.A | Korea          | 40.3399  | 127.5101 | SRR18125366 | SAMN26179237 |
| 135.A | Korea          | 40.3399  | 127.5101 | SRR18125365 | SAMN26179238 |
| 136.A | Korea          | 40.3399  | 127.5101 | SRR18125364 | SAMN26179239 |
| 137.A | China          | 42.5246  | 87.5396  | SRR18125363 | SAMN26179240 |
| 138.A | China          | 39.4677  | 75.9938  | SRR18125362 | SAMN26179241 |
| 139.A | Uzbekistan     | 41.2995  | 69.2401  | SRR18125361 | SAMN26179242 |
| 14.B  | Uzbekistan     | 39.7681  | 64.4556  | SRR18125360 | SAMN26179243 |
| 140.B | China          | 42.5246  | 87.5396  | SRR18125359 | SAMN26179244 |
| 141.A | China          | 43.8256  | 87.6168  | SRR18125358 | SAMN26179245 |
| 142.B | China          | 42.5246  | 87.5396  | SRR18125357 | SAMN26179246 |
| 144.A | Ukraine        | 48.4647  | 35.0462  | SRR18125355 | SAMN26179247 |
| 145.A | Brazil         | -22.9329 | -47.0738 | SRR18125354 | SAMN26179248 |
| 146.B | Kazakhstan     | 43.222   | 76.8512  | SRR18125353 | SAMN26179249 |
| 147.A | Turkey         | 39.7646  | 30.4559  | SRR18125352 | SAMN26179250 |
| 148.B | Turkey         | 39.7646  | 30.4559  | SRR18125351 | SAMN26179251 |
| 149.A | Ukraine        | 48.0386  | 30.9497  | SRR18125350 | SAMN26179252 |
| 151.A | Tajikistan     | 38.5598  | 68.787   | SRR18125349 | SAMN26179253 |
| 154.A | Brazil         | -14.235  | -51.9253 | SRR18125348 | SAMN26179254 |
| 155.A | United Kingdom | 52.3555  | -1.1743  | SRR18125347 | SAMN26179255 |
| 156.A | India          | 25.9821  | 85.6486  | SRR18125346 | SAMN26179256 |
| 157.A | India          | 25.9821  | 85.6486  | SRR18125344 | SAMN26179257 |
| 158.A | India          | 25.9821  | 85.6486  | SRR18125343 | SAMN26179258 |
| 159.B | India          | 25.9821  | 85.6486  | SRR18125342 | SAMN26179259 |
| 16.A  | Uzbekistan     | 39.7681  | 64.4556  | SRR18125341 | SAMN26179260 |
| 160.A | Uzbekistan     | 40.8154  | 72.2837  | SRR18125340 | SAMN26179261 |
| 161.A | Uzbekistan     | 40.8154  | 72.2837  | SRR18125339 | SAMN26179262 |
| 162.A | South Africa   | -26.7145 | 27.097   | SRR18125338 | SAMN26179263 |
| 163.A | South Africa   | -26.7145 | 27.097   | SRR18125337 | SAMN26179264 |
| 164.A | South Africa   | -26.7145 | 27.097   | SRR18125336 | SAMN26179265 |
| 165.B | USA            | 39.9526  | -75.1652 | SRR18125299 | SAMN26179266 |
| 166.A | USA            | 39.9526  | -75.1652 | SRR18125297 | SAMN26179267 |
| 167.B | Kyrgyzstan     | 42.8224  | 75.3179  | SRR18125296 | SAMN26179268 |
| 168.A | Kyrgyzstan     | 42.8224  | 75.3179  | SRR18125295 | SAMN26179269 |
| 17.B  | Uzbekistan     | 39.7681  | 64.4556  | SRR18125294 | SAMN26179270 |
| 170.A | Russia         | 43.2562  | 46.5893  | SRR18125293 | SAMN26179271 |
| 171.A | Russia         | 43.2562  | 46.5893  | SRR18125292 | SAMN26179272 |

|       |             |           |           |             |              |
|-------|-------------|-----------|-----------|-------------|--------------|
| 172.B | Iran        | 32.4279   | 53.688    | SRR18125291 | SAMN26179273 |
| 173.A | Iran        | 32.4279   | 53.688    | SRR18125290 | SAMN26179274 |
| 174.A | Korea       | 40.3399   | 127.5101  | SRR18125289 | SAMN26179275 |
| 175.A | Uzbekistan  | 40.2504   | 63.2032   | SRR18125288 | SAMN26179276 |
| 175.B | Uzbekistan  | 40.2504   | 63.2032   | SRR18125286 | SAMN26179277 |
| 176.A | Uzbekistan  | 40.2504   | 63.2032   | SRR18125285 | SAMN26179278 |
| 177.A | Uzbekistan  | 40.2504   | 63.2032   | SRR18125284 | SAMN26179279 |
| 178.A | Uzbekistan  | 40.2504   | 63.2032   | SRR18125283 | SAMN26179280 |
| 179.A | Uzbekistan  | 39.9208   | 66.4271   | SRR18125282 | SAMN26179281 |
| 18.B  | Uzbekistan  | 39.7681   | 64.4556   | SRR18125281 | SAMN26179282 |
| 180.A | Uzbekistan  | 39.9208   | 66.4271   | SRR18125280 | SAMN26179283 |
| 181.A | Uzbekistan  | 39.9208   | 66.4271   | SRR18125279 | SAMN26179284 |
| 182.B | Uzbekistan  | 39.9208   | 66.4271   | SRR18125278 | SAMN26179285 |
| 183.A | Uzbekistan  | 40.3734   | 71.7978   | SRR18125277 | SAMN26179286 |
| 184.A | China       | 41.482754 | 85.626702 | SRR18125275 | SAMN26179287 |
| 187.A | China       | 38.10222  | 76.993816 | SRR18125274 | SAMN26179288 |
| 188.B | China       | 41.1675   | 80.2634   | SRR18125273 | SAMN26179289 |
| 189.A | China       | 41.1675   | 80.2634   | SRR18125272 | SAMN26179290 |
| 19.B  | Iran        | 32.4279   | 53.688    | SRR18125271 | SAMN26179291 |
| 190.A | China       | 42.9513   | 89.1898   | SRR18125270 | SAMN26179292 |
| 191.A | China       | 41.175324 | 85.660861 | SRR18125269 | SAMN26179293 |
| 192.A | India       | 31.8183   | 75.2071   | SRR18125268 | SAMN26179294 |
| 193.A | India       | 31.326    | 75.5762   | SRR18125267 | SAMN26179295 |
| 193.B | India       | 31.326    | 75.5762   | SRR18125265 | SAMN26179296 |
| 194.A | India       | 30.3752   | 76.7821   | SRR18125480 | SAMN26179297 |
| 195.A | India       | 28.7041   | 77.1025   | SRR18125407 | SAMN26179298 |
| 195.B | India       | 28.7041   | 77.1025   | SRR18125406 | SAMN26179299 |
| 197.A | India       | 17.6599   | 75.9064   | SRR18125405 | SAMN26179300 |
| 199.A | Senegal     | 14.4974   | -14.4524  | SRR18125404 | SAMN26179301 |
| 1A    | USA         | NA        | NA        | SRR18125403 | SAMN26179302 |
| 201.B | Pakistan    | 31.5204   | 74.3587   | SRR18125402 | SAMN26179303 |
| 202.B | Canada      | 43.6502   | -79.9036  | SRR18125401 | SAMN26179304 |
| 203.A | Ethiopia    | 9.3126    | 42.1227   | SRR18125400 | SAMN26179305 |
| 204.B | Indonesia   | -6.5971   | 106.806   | SRR18125399 | SAMN26179306 |
| 205.A | Indonesia   | -6.5971   | 106.806   | SRR18125397 | SAMN26179307 |
| 205.B | Indonesia   | -6.5971   | 106.806   | SRR18125396 | SAMN26179308 |
| 206.A | Hungary     | 47.1625   | 19.5033   | SRR18125395 | SAMN26179309 |
| 207.A | Viet Nam    | 14.0583   | 108.2772  | SRR18125394 | SAMN26179310 |
| 21.B  | Kazakhstan  | 51.1605   | 71.4704   | SRR18125393 | SAMN26179311 |
| 210.A | Afghanistan | 36.6926   | 67.118    | SRR18125392 | SAMN26179312 |
| 212.A | Viet Nam    | 21.0278   | 105.8342  | SRR18125391 | SAMN26179313 |

|       |              |           |           |             |              |
|-------|--------------|-----------|-----------|-------------|--------------|
| 215.A | Guinea       | 8.5383    | -9.4728   | SRR18125390 | SAMN26179314 |
| 216.A | Uzbekistan   | 39.972132 | 65.558096 | SRR18125389 | SAMN26179315 |
| 217.B | Uzbekistan   | 40.162885 | 66.227209 | SRR18125388 | SAMN26179316 |
| 218.A | Uzbekistan   | 40.013465 | 64.943243 | SRR18125386 | SAMN26179317 |
| 219.A | Turkmenistan | 40.243331 | 59.540314 | SRR18125385 | SAMN26179318 |
| 22.B  | Kazakhstan   | 42.3417   | 69.5901   | SRR18125384 | SAMN26179319 |
| 220.A | Turkmenistan | 40.243331 | 59.540314 | SRR18125383 | SAMN26179320 |
| 223.A | Uzbekistan   | 40.483568 | 70.546311 | SRR18125382 | SAMN26179321 |
| 224.A | Iran         | 32.6539   | 51.666    | SRR18125381 | SAMN26179322 |
| 225.A | Pakistan     | 30.3753   | 69.3451   | SRR18125380 | SAMN26179323 |
| 226.B | Pakistan     | 30.3753   | 69.3451   | SRR18125379 | SAMN26179324 |
| 227.A | Pakistan     | 30.3753   | 69.3451   | SRR18125378 | SAMN26179325 |
| 228.B | Turkmenistan | 39.0041   | 63.5688   | SRR18125377 | SAMN26179326 |
| 229.A | Pakistan     | 31.4504   | 73.135    | SRR18125375 | SAMN26179327 |
| 23.A  | Kazakhstan   | 42.3417   | 69.5901   | SRR18125374 | SAMN26179328 |
| 230.A | Pakistan     | 31.4504   | 73.135    | SRR18125373 | SAMN26179329 |
| 230.B | Pakistan     | 31.4504   | 73.135    | SRR18125372 | SAMN26179330 |
| 231.A | Tanzania     | -6.369    | 34.8888   | SRR18125335 | SAMN26179331 |
| 232.A | Iran         | 34.3277   | 47.0778   | SRR18125334 | SAMN26179332 |
| 233.A | Iran         | 32.4279   | 53.688    | SRR18125333 | SAMN26179333 |
| 234.A | India        | 28.6139   | 77.209    | SRR18125332 | SAMN26179334 |
| 235.A | Pakistan     | 33.5651   | 73.0169   | SRR18125331 | SAMN26179335 |
| 235.B | Pakistan     | 33.5651   | 73.0169   | SRR18125330 | SAMN26179336 |
| 236.A | Pakistan     | 34.0155   | 71.6888   | SRR18125328 | SAMN26179337 |
| 237.A | Pakistan     | 28.6001   | 77.227    | SRR18125327 | SAMN26179338 |
| 238.A | Egypt        | 26.8206   | 30.8025   | SRR18125326 | SAMN26179339 |
| 239.A | Kazakhstan   | 44.7689   | 77.5573   | SRR18125325 | SAMN26179340 |
| 24.A  | Uzbekistan   | 41.4065   | 60.3685   | SRR18125324 | SAMN26179341 |
| 240.A | Uzbekistan   | 39.4065   | 67.1418   | SRR18125323 | SAMN26179342 |
| 240.B | Uzbekistan   | 39.4065   | 67.1418   | SRR18125322 | SAMN26179343 |
| 241.A | Uzbekistan   | 40.023044 | 67.433724 | SRR18125321 | SAMN26179344 |
| 242.A | Uzbekistan   | 39.982851 | 67.486778 | SRR18125320 | SAMN26179345 |
| 244.A | Uzbekistan   | 41.773406 | 63.780613 | SRR18125319 | SAMN26179346 |
| 245.A | Kazakhstan   | 43.47491  | 75.335144 | SRR18125317 | SAMN26179347 |
| 246.A | Algeria      | 35.6971   | -0.6308   | SRR18125316 | SAMN26179348 |
| 247.A | Tanzania     | -5.0425   | 32.8197   | SRR18125315 | SAMN26179349 |
| 249.A | Australia    | -32.9283  | 151.7817  | SRR18125314 | SAMN26179350 |
| 25.A  | Uzbekistan   | 41.4065   | 60.3685   | SRR18125313 | SAMN26179351 |
| 250.B | Russia       | NA        | NA        | SRR18125312 | SAMN26179352 |
| 251.B | USA          | NA        | NA        | SRR18125311 | SAMN26179353 |
| 252.A | Afghanistan  | 34.7602   | 69.8121   | SRR18125310 | SAMN26179354 |

|       |             |           |           |             |              |
|-------|-------------|-----------|-----------|-------------|--------------|
| 253.A | Afghanistan | 34.7602   | 69.8121   | SRR18125309 | SAMN26179355 |
| 254.A | Yemen       | 15.5527   | 48.5164   | SRR18125308 | SAMN26179356 |
| 254.B | Yemen       | 15.5527   | 48.5164   | SRR18125306 | SAMN26179357 |
| 255.A | Afghanistan | 36.6926   | 67.118    | SRR18125305 | SAMN26179358 |
| 256.A | Afghanistan | 36.6926   | 67.118    | SRR18125304 | SAMN26179359 |
| 257.B | Afghanistan | 36.6926   | 67.118    | SRR18125303 | SAMN26179360 |
| 258.B | Afghanistan | 33.9391   | 67.71     | SRR18125302 | SAMN26179361 |
| 259.B | Colombia    | 4.5709    | -74.2973  | SRR18125301 | SAMN26179362 |
| 26.B  | Uzbekistan  | 41.4065   | 60.3685   | SRR18125300 | SAMN26179363 |
| 260.A | Philippines | 14.5995   | 120.9842  | SRR18125479 | SAMN26179364 |
| 261.B | Kenya       | -1.2921   | 36.8219   | SRR18125478 | SAMN26179365 |
| 262.A | Kenya       | -1.2921   | 36.8219   | SRR18125477 | SAMN26179366 |
| 263.A | Kenya       | -1.2921   | 36.8219   | SRR18125475 | SAMN26179367 |
| 264.A | Kenya       | -1.2921   | 36.8219   | SRR18125474 | SAMN26179368 |
| 265.B | Kenya       | -1.2921   | 36.8219   | SRR18125473 | SAMN26179369 |
| 266.A | Kenya       | -1.2921   | 36.8219   | SRR18125472 | SAMN26179370 |
| 267.A | Kenya       | -1.2921   | 36.8219   | SRR18125471 | SAMN26179371 |
| 268.A | Kenya       | -1.2921   | 36.8219   | SRR18125470 | SAMN26179372 |
| 269.B | Kenya       | -1.2921   | 36.8219   | SRR18125469 | SAMN26179373 |
| 27.A  | Uzbekistan  | 39.7681   | 64.4556   | SRR18125468 | SAMN26179374 |
| 270.A | Kenya       | -1.2921   | 36.8219   | SRR18125467 | SAMN26179375 |
| 271.A | South Korea | 35.8987   | 127.0392  | SRR18125466 | SAMN26179376 |
| 272.A | Australia   | NA        | NA        | SRR18125464 | SAMN26179377 |
| 273.A | Kenya       | -1.2921   | 36.8219   | SRR18125463 | SAMN26179378 |
| 274.A | Kenya       | -1.2921   | 36.8219   | SRR18125462 | SAMN26179379 |
| 275.A | Kenya       | -1.2921   | 36.8219   | SRR18125461 | SAMN26179380 |
| 276.A | Kenya       | -1.2921   | 36.8219   | SRR18125460 | SAMN26179381 |
| 277.B | Kazakhstan  | 43.1521   | 68.2581   | SRR18125459 | SAMN26179382 |
| 278.B | Kazakhstan  | 43.0631   | 69.0851   | SRR18125458 | SAMN26179383 |
| 279.A | Kazakhstan  | 41.5295   | 69.4133   | SRR18125457 | SAMN26179384 |
| 28.A  | Russia      | 42.1432   | 47.095    | SRR18125456 | SAMN26179385 |
| 280.B | Kazakhstan  | 41.5295   | 69.4133   | SRR18125455 | SAMN26179386 |
| 281.B | South Korea | 35.8987   | 127.0392  | SRR18125453 | SAMN26179387 |
| 282.B | South Korea | 35.8987   | 127.0392  | SRR18125452 | SAMN26179388 |
| 283.B | South Korea | 35.8987   | 127.0392  | SRR18125451 | SAMN26179389 |
| 284.A | Tajikistan  | 38.0116   | 71.003    | SRR18125450 | SAMN26179390 |
| 285.A | Tajikistan  | 37.074793 | 67.957222 | SRR18125449 | SAMN26179391 |
| 286.A | Tajikistan  | 37.028926 | 68.004059 | SRR18125448 | SAMN26179392 |
| 287.A | Tajikistan  | 39.179338 | 68.012339 | SRR18125447 | SAMN26179393 |
| 288.A | Philippines | 14.5995   | 120.9842  | SRR18125446 | SAMN26179394 |
| 289.B | Philippines | 14.5995   | 120.9842  | SRR18125445 | SAMN26179395 |



|       |              |         |          |             |              |
|-------|--------------|---------|----------|-------------|--------------|
| 290.A | China        | 40.2374 | 116.2305 | SRR18125444 | SAMN26179396 |
| 290.B | China        | 40.2374 | 116.2305 | SRR18125263 | SAMN26179397 |
| 291.A | China        | 40.2374 | 116.2305 | SRR18125262 | SAMN26179398 |
| 292.A | China        | 30.7378 | 112.2384 | SRR18125261 | SAMN26179399 |
| 293.A | China        | 30.7378 | 112.2384 | SRR18125260 | SAMN26179400 |
| 294.A | China        | 40.2374 | 116.2305 | SRR18125259 | SAMN26179401 |
| 295.B | China        | 37.8957 | 114.9042 | SRR18125258 | SAMN26179402 |
| 296.A | China        | 37.8957 | 114.9042 | SRR18125257 | SAMN26179403 |
| 297.A | China        | 47.1216 | 128.7382 | SRR18125256 | SAMN26179404 |
| 298.B | China        | 47.1216 | 128.7382 | SRR18125255 | SAMN26179405 |
| 299.A | China        | 40.2374 | 116.2305 | SRR18125254 | SAMN26179406 |
| 2A    | China        | 47.1216 | 128.7382 | SRR18125252 | SAMN26179407 |
| 3.B   | China        | 47.1216 | 128.7382 | SRR18125251 | SAMN26179408 |
| 30.A  | Russia       | 42.1432 | 47.095   | SRR18125250 | SAMN26179409 |
| 300.A | China        | 47.1216 | 128.7382 | SRR18125249 | SAMN26179410 |
| 31.A  | Russia       | 42.1432 | 47.095   | SRR18125248 | SAMN26179411 |
| 32.B  | Russia       | 42.1432 | 47.095   | SRR18125247 | SAMN26179412 |
| 33.A  | USA          | NA      | NA       | SRR18125246 | SAMN26179413 |
| 34.A  | USA          | NA      | NA       | SRR18125245 | SAMN26179414 |
| 34.B  | USA          | NA      | NA       | SRR18125244 | SAMN26179415 |
| 35.A  | Russia       | NA      | NA       | SRR18125243 | SAMN26179416 |
| 36.A  | Russia       | 43.1198 | 131.8869 | SRR18125241 | SAMN26179417 |
| 37.A  | USA          | NA      | NA       | SRR18125240 | SAMN26179418 |
| 38.B  | China        | 44.9188 | 130.5244 | SRR18125239 | SAMN26179419 |
| 39.A  | Iran         | 36.3394 | 59.4698  | SRR18125238 | SAMN26179420 |
| 3A    | China        | 47.1216 | 128.7382 | SRR18125237 | SAMN26179421 |
| 40.B  | Iran         | 36.3394 | 59.4698  | SRR18125236 | SAMN26179422 |
| 41.B  | Iran         | 32.4279 | 53.688   | SRR18125235 | SAMN26179423 |
| 42.A  | Iran         | 32.4279 | 53.688   | SRR18125234 | SAMN26179424 |
| 43.A  | Iran         | 32.4279 | 53.688   | SRR18125233 | SAMN26179425 |
| 44.B  | Turkmenistan | 37.9153 | 58.0897  | SRR18125232 | SAMN26179426 |
| 45.A  | Turkmenistan | 37.9153 | 58.0897  | SRR18125230 | SAMN26179427 |
| 46.A  | Turkmenistan | 37.9153 | 58.0897  | SRR18125443 | SAMN26179428 |
| 47.A  | Turkmenistan | 37.9153 | 58.0897  | SRR18125442 | SAMN26179429 |
| 48.B  | Turkmenistan | 37.9153 | 58.0897  | SRR18125441 | SAMN26179430 |
| 49.B  | Turkmenistan | 37.9172 | 58.0907  | SRR18125440 | SAMN26179431 |
| 4A    | China        | 47.1216 | 128.7382 | SRR18125439 | SAMN26179432 |
| 5.B   | China        | 47.1216 | 128.7382 | SRR18125438 | SAMN26179433 |
| 50.A  | Turkmenistan | 37.9172 | 58.0907  | SRR18125437 | SAMN26179434 |
| 51.B  | Turkmenistan | 37.9601 | 58.3261  | SRR18125436 | SAMN26179435 |
| 52.A  | Turkmenistan | 37.9601 | 58.3261  | SRR18125435 | SAMN26179436 |

|      |             |         |           |             |              |
|------|-------------|---------|-----------|-------------|--------------|
| 53.B | USA         | 40.1605 | -103.2144 | SRR18125433 | SAMN26179437 |
| 54.A | USA         | 40.1605 | -103.2144 | SRR18125432 | SAMN26179438 |
| 55.B | Ukraine     | 48.3794 | 31.1656   | SRR18125431 | SAMN26179439 |
| 56.A | Kazakhstan  | 43.3667 | 68.4094   | SRR18125430 | SAMN26179440 |
| 57.A | Iran        | 34.7608 | 48.3988   | SRR18125429 | SAMN26179441 |
| 58.A | Iran        | 35.6892 | 51.389    | SRR18125428 | SAMN26179442 |
| 59.B | Kazakhstan  | 43.3667 | 68.4094   | SRR18125427 | SAMN26179443 |
| 6.B  | China       | 47.1216 | 128.7382  | SRR18125426 | SAMN26179444 |
| 60.A | Kazakhstan  | 42.2663 | 68.1431   | SRR18125425 | SAMN26179445 |
| 61.A | Uzbekistan  | 41.2995 | 69.2401   | SRR18125424 | SAMN26179446 |
| 62.A | Uzbekistan  | 41.2995 | 69.2401   | SRR18125422 | SAMN26179447 |
| 63.A | Uzbekistan  | 41.2995 | 69.2401   | SRR18125421 | SAMN26179448 |
| 64.B | Uzbekistan  | 41.2995 | 69.2401   | SRR18125420 | SAMN26179449 |
| 65.B | Uzbekistan  | 41.2995 | 69.2401   | SRR18125419 | SAMN26179450 |
| 66.B | Uzbekistan  | 41.2995 | 69.2401   | SRR18125418 | SAMN26179451 |
| 67.A | Uzbekistan  | 41.2995 | 69.2401   | SRR18125417 | SAMN26179452 |
| 68.A | Uzbekistan  | 41.2995 | 69.2401   | SRR18125416 | SAMN26179453 |
| 69.A | Uzbekistan  | 40.4915 | 68.7811   | SRR18125415 | SAMN26179454 |
| 70.A | Uzbekistan  | 39.627  | 66.975    | SRR18125414 | SAMN26179455 |
| 71.A | Uzbekistan  | 39.627  | 66.975    | SRR18125413 | SAMN26179456 |
| 72.A | Uzbekistan  | 39.627  | 66.975    | SRR18125411 | SAMN26179457 |
| 73.B | Uzbekistan  | 39.627  | 66.975    | SRR18125410 | SAMN26179458 |
| 74.A | Uzbekistan  | 39.627  | 66.975    | SRR18125409 | SAMN26179459 |
| 75.A | Uzbekistan  | 39.627  | 66.975    | SRR18125408 | SAMN26179460 |
| 76.A | Uzbekistan  | 41.2995 | 69.2401   | SRR18125229 | SAMN26179461 |
| 77.A | Uzbekistan  | 39.7681 | 64.4556   | SRR18125228 | SAMN26179462 |
| 79.B | Uzbekistan  | 39.7681 | 64.4556   | SRR18125227 | SAMN26179463 |
| 7A   | China       | 47.1216 | 128.7382  | SRR18125226 | SAMN26179464 |
| 8.B  | China       | 47.1216 | 128.7382  | SRR18125225 | SAMN26179465 |
| 81.B | Afghanistan | 34.1769 | 61.7006   | SRR18125224 | SAMN26179466 |
| 82.B | Afghanistan | 34.1769 | 61.7006   | SRR18125222 | SAMN26179467 |
| 83.A | Afghanistan | 34.1769 | 61.7006   | SRR18125221 | SAMN26179468 |
| 84.A | Afghanistan | 34.1769 | 61.7006   | SRR18125220 | SAMN26179469 |
| 85.A | Afghanistan | 34.1769 | 61.7006   | SRR18125219 | SAMN26179470 |
| 86.A | Afghanistan | 36.6153 | 66.9293   | SRR18125218 | SAMN26179471 |
| 88.B | Afghanistan | NA      | NA        | SRR18125217 | SAMN26179472 |
| 89.B | Afghanistan | 33.9391 | 67.71     | SRR18125216 | SAMN26179473 |
| 90.B | Uzbekistan  | NA      | NA        | SRR18125215 | SAMN26179474 |
| 91.A | Japan       | 35.719  | 139.7456  | SRR18125214 | SAMN26179475 |
| 92.A | Japan       | 35.719  | 139.7456  | SRR18125213 | SAMN26179476 |
| 93.B | Armenia     | 40.0691 | 45.0382   | SRR18125211 | SAMN26179477 |



|      |              |         |          |             |              |
|------|--------------|---------|----------|-------------|--------------|
| 94.A | Iran         | 35.102  | 59.1042  | SRR18125210 | SAMN26179478 |
| 95.A | Azerbaijan   | 40.4093 | 49.8671  | SRR18125209 | SAMN26179479 |
| 96.A | Azerbaijan   | 40.1431 | 47.5769  | SRR18125208 | SAMN26179480 |
| 97.A | Turkmenistan | 39.0041 | 63.5688  | SRR18125207 | SAMN26179481 |
| 98.B | Panama       | 9.3593  | -79.8999 | SRR18125206 | SAMN26179482 |
| 99.A | Panama       | 9.3593  | -79.8999 | SRR18125205 | SAMN26179483 |
| 99.B | Panama       | 9.3593  | -79.8999 | SRR18125204 | SAMN26179484 |
| 9A   | China        | 47.1216 | 128.7382 | SRR18125203 | SAMN26179485 |
| M7.A | India        | 31.5204 | 74.3587  | SRR18125202 | SAMN26179486 |

---

1049 **Supplementary file 2.** Outgroup  $f_3$  statistics among all possible combinations of genetic group  
1050 pairs  
1051

| <b>Outgroup<br/>(C)</b> | <b>Source<br/>1<br/>(A)</b> | <b>Source2<br/>(B)</b> | <b><math>f_3</math></b> | <b>Standard error</b> | <b>Z-score</b> | <b>Significant</b> |
|-------------------------|-----------------------------|------------------------|-------------------------|-----------------------|----------------|--------------------|
| <i>sublobata</i>        | CA                          | EA                     | 0.232                   | 0.005                 | 42.66          | Yes                |
| <i>sublobata</i>        | CA                          | SA                     | 0.209                   | 0.005                 | 38.41          | Yes                |
| <i>sublobata</i>        | CA                          | SEA                    | 0.213                   | 0.005                 | 39.03          | Yes                |
| <i>sublobata</i>        | EA                          | SA                     | 0.209                   | 0.005                 | 38.79          | Yes                |
| <i>sublobata</i>        | EA                          | SEA                    | 0.218                   | 0.005                 | 40.75          | Yes                |
| <i>sublobata</i>        | SA                          | SEA                    | 0.211                   | 0.005                 | 39.41          | Yes                |

1052 Abbreviations: SA, South Asia; SEA, Southeast Asia; EA, East Asia and CA, Central Asia  
1053 ( $f_3$  statistics with Z-score  $> |3|$  are considered significant)  
1054

1055 **Supplementary file 3.** Admixture  $f_3$  statistics among all possible population trios  
1056

| <b>Target<br/>(C)</b> | <b>Source1<br/>(A)</b> | <b>Source2<br/>(B)</b> | <b><math>f_3</math></b> | <b>Standard error</b> | <b>Z-score</b> | <b>Significant</b> |
|-----------------------|------------------------|------------------------|-------------------------|-----------------------|----------------|--------------------|
| EA                    | SA                     | CA                     | 0.005                   | 0.001                 | 4.82           | Yes                |
| EA                    | SEA                    | CA                     | -0.001                  | 0.001                 | -0.51          | No                 |
| EA                    | SEA                    | SA                     | 0.020                   | 0.002                 | 13.48          | Yes                |
| SEA                   | CA                     | EA                     | 0.030                   | 0.002                 | 14.7           | Yes                |
| SEA                   | SA                     | CA                     | 0.014                   | 0.002                 | 8.82           | Yes                |
| SEA                   | SA                     | EA                     | 0.009                   | 0.001                 | 6.86           | Yes                |
| SA                    | CA                     | EA                     | 0.032                   | 0.002                 | 16.66          | Yes                |
| SA                    | CA                     | SEA                    | 0.011                   | 0.001                 | 9.02           | Yes                |
| SA                    | EA                     | SEA                    | 0.017                   | 0.001                 | 12.91          | Yes                |
| CA                    | EA                     | SA                     | 0.011                   | 0.001                 | 9.55           | Yes                |
| CA                    | EA                     | SEA                    | 0.016                   | 0.002                 | 10.37          | Yes                |
| CA                    | SEA                    | SA                     | 0.031                   | 0.002                 | 15.65          | Yes                |

1057 Abbreviations: SA, South Asia; SEA, Southeast Asia; EA, East Asia and CA, Central Asia  
1058 ( $f_3$  statistics with Z-score > |3| are considered significant, but only negative  $f_3$  statistics denote  
1059 the target population being admixed from source1 and source2.)  
1060

1061 **Supplementary file 4.** Mantel tests for isolation by distance of inferred genetic group ( $Q \geq 0.5$ )  
1062

| <b>Group</b> | <b><i>r</i></b> | <b><i>P</i></b> |
|--------------|-----------------|-----------------|
| SA           | 0.4319          | 0.008*          |
| SEA          | 0.3312          | 0.041*          |
| EA           | 0.0461          | 0.052           |
| CA           | 0.0070          | 0.435           |
| Southern     | 0.2934          | 0.001*          |
| Northern     | 0.2777          | 0.001*          |

1063 Abbreviations: SA, South Asia; SEA, Southeast Asia; EA, East Asia; CA, Central Asia; *r*, Mantel  
1064 correlation; significance level \*  $P < 0.05$   
1065

1066 **Supplementary file 5.** Description of bioclimatic variables used in ecological niche modelling  
1067

| <b>Bioclimatic variable</b> | <b>Variable</b>                                            | <b>Unit</b> |
|-----------------------------|------------------------------------------------------------|-------------|
| Bio1                        | Annual mean temperature                                    | °C          |
| Bio2                        | Mean diurnal range (mean of monthly (max temp - min temp)) | °C          |
| Bio3                        | Isothermality (Bio2/Bio7) ( $\times 100$ )                 | °C          |
| Bio4                        | Temperature seasonality (standard deviation $\times 100$ ) | °C          |
| Bio5                        | Max temperature of warmest month                           | °C          |
| Bio6                        | Min temperature of coldest month                           | °C          |
| Bio7                        | Temperature annual range (Bio5-Bio6)                       | °C          |
| Bio8                        | Mean temperature of wettest quarter                        | °C          |
| Bio9                        | Mean temperature of driest quarter                         | °C          |
| Bio10                       | Mean temperature of warmest quarter                        | °C          |
| Bio11                       | Mean temperature of coldest quarter                        | °C          |
| Bio12                       | Annual precipitation                                       | mm          |
| Bio13                       | Precipitation of wettest month                             | mm          |
| Bio14                       | Precipitation of driest month                              | mm          |
| Bio15                       | Precipitation seasonality (coefficient of variation)       | mm          |
| Bio16                       | Precipitation of wettest quarter                           | mm          |
| Bio17                       | Precipitation of driest quarter                            | mm          |
| Bio18                       | Precipitation of warmest quarter                           | mm          |
| Bio19                       | Precipitation of coldest quarter                           | mm          |

1068

1069 **Supplementary file 6.** Pearson's correlation coefficient between pairs of bioclimatic variables (denoted in lower triangle)  
 1070

| <b>Bioclimatic variable</b> | <b>Bio1</b> | <b>Bio2</b> | <b>Bio3</b> | <b>Bio4</b> | <b>Bio5</b> | <b>Bio6</b> | <b>Bio7</b> | <b>Bio8</b> | <b>Bio9</b> | <b>Bio10</b> | <b>Bio11</b> | <b>Bio12</b> | <b>Bio13</b> | <b>Bio14</b> | <b>Bio15</b> | <b>Bio16</b> | <b>Bio17</b> | <b>Bio18</b> | <b>Bio19</b> |
|-----------------------------|-------------|-------------|-------------|-------------|-------------|-------------|-------------|-------------|-------------|--------------|--------------|--------------|--------------|--------------|--------------|--------------|--------------|--------------|--------------|
| <b>Bio1</b>                 | 1           | -           | -           | -           | -           | -           | -           | -           | -           | -            | -            | -            | -            | -            | -            | -            | -            | -            | -            |
| <b>Bio2</b>                 | 0.087       | 1           | -           | -           | -           | -           | -           | -           | -           | -            | -            | -            | -            | -            | -            | -            | -            | -            | -            |
| <b>Bio3</b>                 | 0.732       | 0.321       | 1           | -           | -           | -           | -           | -           | -           | -            | -            | -            | -            | -            | -            | -            | -            | -            | -            |
| <b>Bio4</b>                 | -0.814      | 0.011       | -0.876      | 1           | -           | -           | -           | -           | -           | -            | -            | -            | -            | -            | -            | -            | -            | -            | -            |
| <b>Bio5</b>                 | 0.872       | 0.258       | 0.455       | -0.449      | 1           | -           | -           | -           | -           | -            | -            | -            | -            | -            | -            | -            | -            | -            | -            |
| <b>Bio6</b>                 | 0.971       | -0.038      | 0.779       | -0.911      | 0.749       | 1           | -           | -           | -           | -            | -            | -            | -            | -            | -            | -            | -            | -            | -            |
| <b>Bio7</b>                 | -0.773      | 0.225       | -0.784      | 0.973       | -0.377      | -0.896      | 1           | -           | -           | -            | -            | -            | -            | -            | -            | -            | -            | -            | -            |
| <b>Bio8</b>                 | 0.595       | -0.066      | 0.383       | -0.398      | 0.522       | 0.530       | -0.392      | 1           | -           | -            | -            | -            | -            | -            | -            | -            | -            | -            | -            |
| <b>Bio9</b>                 | 0.901       | 0.122       | 0.663       | -0.759      | 0.803       | 0.896       | -0.715      | 0.257       | 1           | -            | -            | -            | -            | -            | -            | -            | -            | -            | -            |
| <b>Bio10</b>                | 0.915       | 0.129       | 0.472       | -0.513      | 0.983       | 0.808       | -0.472      | 0.590       | 0.815       | 1            | -            | -            | -            | -            | -            | -            | -            | -            | -            |
| <b>Bio11</b>                | 0.977       | 0.050       | 0.814       | -0.918      | 0.760       | 0.994       | -0.881      | 0.544       | 0.894       | 0.811        | 1            | -            | -            | -            | -            | -            | -            | -            | -            |
| <b>Bio12</b>                | 0.237       | -0.513      | 0.244       | -0.397      | -0.030      | 0.327       | -0.477      | 0.293       | 0.121       | 0.073        | 0.303        | 1            | -            | -            | -            | -            | -            | -            | -            |
| <b>Bio13</b>                | 0.276       | -0.341      | 0.289       | -0.403      | 0.040       | 0.332       | -0.438      | 0.342       | 0.142       | 0.124        | 0.330        | 0.926        | 1            | -            | -            | -            | -            | -            | -            |
| <b>Bio14</b>                | -0.084      | -0.620      | -0.151      | -0.011      | -0.205      | 0.013       | -0.154      | 0.039       | -0.120      | -0.126       | -0.048       | 0.494        | 0.233        | 1            | -            | -            | -            | -            | -            |
| <b>Bio15</b>                | 0.258       | 0.528       | 0.405       | -0.263      | 0.208       | 0.191       | -0.128      | 0.302       | 0.156       | 0.189        | 0.262        | -0.024       | 0.213        | -0.521       | 1            | -            | -            | -            | -            |
| <b>Bio16</b>                | 0.271       | -0.364      | 0.283       | -0.406      | 0.028       | 0.333       | -0.446      | 0.330       | 0.141       | 0.115        | 0.328        | 0.950        | 0.992        | 0.258        | 0.178        | 1            | -            | -            | -            |
| <b>Bio17</b>                | -0.050      | -0.639      | -0.110      | -0.058      | -0.194      | 0.052       | -0.203      | 0.062       | -0.089      | -0.110       | -0.009       | 0.555        | 0.294        | 0.988        | -0.508       | 0.321        | 1            | -            | -            |
| <b>Bio18</b>                | -0.031      | -0.453      | -0.011      | -0.119      | -0.257      | 0.027       | -0.210      | 0.245       | -0.184      | -0.144       | 0.015        | 0.805        | 0.741        | 0.392        | 0.016        | 0.766        | 0.438        | 1            | -            |
| <b>Bio19</b>                | 0.177       | -0.270      | 0.266       | -0.279      | 0.048       | 0.263       | -0.335      | -0.010      | 0.218       | 0.080        | 0.227        | 0.460        | 0.353        | 0.468        | -0.196       | 0.356        | 0.490        | 0.115        | 1            |

1071



1072 **Supplementary file 7.** Comparison of bioclimatic variables among the four genetic groups  
1073 analysed with multivariate analysis of variance (MANOVA)  
1074

| <b>Predictor</b> | <b>Test statistic</b> | <b>Df</b> | <b>Observed value</b> | <b>F value</b> | <b>Num. Df</b> | <b>Den. Df</b> | <b>P</b> |
|------------------|-----------------------|-----------|-----------------------|----------------|----------------|----------------|----------|
| Genetic group    | Pillai                | 3         | 1.790                 | 44.215         | 24             | 717            | < 2e-16  |
|                  | Wilks                 | 3         | 0.024                 | 74.690         | 24             | 688            | < 2e-16  |
|                  | Hotelling-Lawley      | 3         | 12.716                | 124.870        | 24             | 707            | < 2e-16  |
|                  | Roy                   | 3         | 10.777                | 321.960        | 8              | 239            | < 2e-16  |

1075 Df = degree of freedom among groups; Num. Df = degrees of freedom of the model; Den. Df =  
1076 degree of freedom of residual  
1077

1078 **Supplementary file 8.** Summary of analysis of variance (ANOVA) for bioclimatic variables  
1079

---

| <b>Bioclimatic variable</b>                | <b>Df</b> | <b>Sum square</b> | <b>Mean square</b> | <b>F value</b> | <b>P</b> |
|--------------------------------------------|-----------|-------------------|--------------------|----------------|----------|
| Bio1 (Annual temperature)                  | 3         | 183.688           | 61.229             | 235.97         | <2.2e-16 |
| Bio2 (Mean diurnal temperature range)      | 3         | 66.253            | 22.085             | 29.813         | <2.2e-16 |
| Bio3 (Isothermality)                       | 3         | 188.031           | 62.677             | 259.34         | <2.2e-16 |
| Bio8 (Mean temperature of wettest quarter) | 3         | 177.063           | 59.021             | 205.91         | <2.2e-16 |
| Bio12 (Annual precipitation)               | 3         | 157.890           | 52.630             | 144.11         | <2.2e-16 |
| Bio14 (Precipitation of driest month)      | 3         | 29.859            | 9.952              | 11.183         | <6.6e-07 |
| Bio15 (Precipitation seasonality)          | 3         | 119.810           | 39.938             | 76.62          | <2.2e-16 |
| Bio19 (Precipitation of coldest quarter)   | 3         | 44.212            | 14.737             | 17.732         | <1.9e-10 |

---

1080 Df = degree of freedom

1081

1082 **Supplementary file 9.** Correlation between eight bioclimatic variables and climatic PC axes 1 to  
1083 4  
1084

| <b>Bioclimatic variable</b>                | <b>PC1</b>    | <b>PC2</b>    | <b>PC3</b>   | <b>PC4</b>   |
|--------------------------------------------|---------------|---------------|--------------|--------------|
| Bio1 (Annual temperature)                  | <b>-0.445</b> | -0.107        | 0.390        | -0.056       |
| Bio2 (Mean diurnal temperature range)      | 0.193         | <b>-0.564</b> | 0.062        | 0.253        |
| Bio3 (Isothermality)                       | <b>-0.430</b> | -0.082        | <b>0.492</b> | -0.184       |
| Bio8 (Mean temperature of wettest quarter) | <b>-0.486</b> | 0.042         | -0.287       | 0.049        |
| Bio12 (Annual precipitation)               | <b>-0.401</b> | 0.366         | 0.066        | 0.202        |
| Bio14 (Precipitation of driest month)      | 0.017         | <b>0.582</b>  | -0.248       | 0.259        |
| Bio15 (Precipitation seasonality)          | -0.323        | -0.365        | -0.292       | <b>0.667</b> |
| Bio19 (Precipitation of coldest quarter)   | 0.279         | 0.235         | <b>0.607</b> | <b>0.587</b> |

1085 (Correlation coefficients with absolute values higher than 0.4 are in bold.)  
1086

1087 **Supplementary file 10.** Comparison of summer growing season data including temperature and  
1088 precipitation of May, July and September among the four genetic groups analysed with  
1089 multivariate analysis of variance (MANOVA)  
1090

| Predictor     | Test statistic   | Df | Observed value | F value | Num. Df | Den. Df | <i>P</i> |
|---------------|------------------|----|----------------|---------|---------|---------|----------|
| Genetic group | Pillai           | 3  | 1.915          | 70.907  | 18      | 723     | < 2e-16  |
|               | Wilks            | 3  | 0.010          | 156.350 | 18      | 676     | < 2e-16  |
|               | Hotelling-Lawley | 3  | 19.873         | 262.400 | 18      | 713     | < 2e-16  |
|               | Roy              | 3  | 15.400         | 618.570 | 6       | 241     | < 2e-16  |

1091 Df = degree of freedom among groups; Num. Df = degrees of freedom of the model; Den. Df =  
1092 degree of freedom of residual  
1093

1094 **Supplementary file 11.** ANOVA table for all evaluated field traits (phenology, reproduction and size) as well as drought-related traits  
 1095

| Trait                         | Garden        | Model r <sup>2</sup> | Group <i>F</i> | Group <i>P</i> | SEA <sup>1</sup> | SA <sup>1</sup> | CA <sup>1</sup> | Tukey <sup>2</sup> |
|-------------------------------|---------------|----------------------|----------------|----------------|------------------|-----------------|-----------------|--------------------|
| <b>Phenology:</b>             |               |                      |                |                |                  |                 |                 |                    |
| Days to 50% flowering         | Pakistan 2015 | 0.2388               | 7.2144         | 0.0019*        | -0.3702          | 0.6296          | -0.3525         | B,A,B              |
| Days to 50% flowering         | Taiwan 1984   | 0.5266               | 25.5887        | <.0001*        | 0.5723           | 0.3197          | -1.0685         | A,A,B              |
| Days to 50% flowering         | Taiwan 2018   | 0.4465               | 18.5544        | <.0001*        | 0.0974           | 0.6569          | -0.9633         | A,A,B              |
| <b>Reproduction:</b>          |               |                      |                |                |                  |                 |                 |                    |
| 100 seed weight, g            | Pakistan 2015 | 0.4722               | 20.5761        | <.0001*        | 0.9050           | -0.6397         | -0.2756         | A,B,B              |
| Pod length, cm                | Pakistan 2015 | 0.2621               | 8.1698         | 0.0009*        | 0.6810           | -0.2605         | -0.4896         | A,B,B              |
| Pod length, cm                | Taiwan 1984   | 0.7173               | 58.3615        | <.0001*        | 1.0524           | -0.1980         | -1.0232         | A,B,C              |
| Pods per plant                | Pakistan 2015 | 0.4471               | 18.5988        | <.0001*        | -0.6441          | 0.8455          | -0.3062         | B,A,B              |
| 1000 seed weight, g           | Taiwan 1984   | 0.6248               | 38.3053        | <.0001*        | 0.9979           | -0.8380         | -0.1340         | A,C,B              |
| Seed yield per plant, g       | Pakistan 2015 | 0.4666               | 20.1225        | <.0001*        | -0.6210          | 0.8752          | -0.3712         | B,A,B              |
| Seeds per pod                 | Pakistan 2015 | 0.1300               | 3.4372         | 0.0406*        | -0.4875          | 0.2418          | 0.2806          | A,A,A              |
| Seeds per pod                 | Taiwan 1984   | 0.1611               | 4.4168         | 0.0176*        | 0.1413           | 0.3386          | -0.6107         | AB,A,B             |
| <b>Plant size:</b>            |               |                      |                |                |                  |                 |                 |                    |
| Petiole length, cm            | Pakistan 2015 | 0.2943               | 9.5907         | 0.0003*        | 0.5435           | 0.0878          | -0.7798         | A,A,B              |
| Plant height, cm              | Pakistan 2015 | 0.0001               | 0.0024         | 0.9976         | 0.0075           | 0.0055          | -0.0158         | A,A,A              |
| Plant height at flowering, cm | Taiwan 1984   | 0.3981               | 15.2115        | <.0001*        | 0.4811           | 0.3024          | -0.9705         | A,A,B              |
| Plant height at maturity, cm  | Taiwan 1984   | 0.5472               | 27.8000        | <.0001*        | 0.3480           | 0.5605          | -1.1362         | A,A,B              |
| Primary leaf length, cm       | Taiwan 1984   | 0.5454               | 27.5930        | <.0001*        | 0.9813           | -0.4212         | -0.6253         | A,B,B              |
| Primary leaf width, cm        | Taiwan 1984   | 0.6053               | 35.2773        | <.0001*        | 1.0244           | -0.6010         | -0.4313         | A,B,B              |
| Terminal leaflet length, cm   | Pakistan 2015 | 0.2186               | 6.4340         | 0.0034*        | 0.3062           | 0.2643          | -0.7167         | A,A,B              |
| Terminal leaflet width, cm    | Pakistan 2015 | 0.1680               | 4.6458         | 0.0145*        | 0.4361           | 0.0387          | -0.5734         | A,AB,B             |
| <b>Drought (PEG6000):</b>     |               |                      |                |                |                  |                 |                 |                    |

|                                     |          |        |         |         |         |         |         |       |
|-------------------------------------|----------|--------|---------|---------|---------|---------|---------|-------|
| Shoot dry weight (SDW), mg          | NTU 2021 | 0.5998 | 36.7246 | <.0001* | 1.0508  | -0.5607 | -0.5483 | A,B,B |
| Root dry weight (RDW), mg           | NTU 2021 | 0.5964 | 36.2048 | <.0001* | 1.0299  | -0.6933 | -0.3336 | A,B,B |
| Total dry weight (TDW), mg          | NTU 2021 | 0.5934 | 35.7555 | <.0001* | 1.0448  | -0.5883 | -0.5028 | A,B,B |
| Root:Shoot ratio dry weight (RSRDW) | NTU 2021 | 0.3261 | 11.8577 | <.0001* | -0.2316 | -0.4342 | 0.9112  | B,B,A |
| <b>Drought (Control):</b>           |          |        |         |         |         |         |         |       |
| Shoot dry weight (SDW), mg          | NTU 2021 | 0.5779 | 33.5453 | <.0001* | 1.0275  | -0.4709 | -0.6484 | A,B,B |
| Root dry weight (RDW), mg           | NTU 2021 | 0.5205 | 26.5962 | <.0001* | 0.9716  | -0.6077 | -0.3811 | A,B,B |
| Total dry weight (TDW), mg          | NTU 2021 | 0.5638 | 31.6722 | <.0001* | 1.0195  | -0.5374 | -0.5430 | A,B,B |
| Root:Shoot ratio dry weight (RSRDW) | NTU 2021 | 0.1753 | 5.2083  | 0.0089* | -0.3036 | -0.2004 | 0.6773  | B,B,A |

1096 \*Significant at  $P < 0.05$ ; 1: least-square means of each group after inverse normal transformation of raw data; 2: levels not connected  
1097 by same letter are significantly different.  
1098

1099 **Supplementary file 12.** Mean of eight bioclimatic variables of the genetic groups

1100

| <b>Bioclimatic variable</b> | <b>Northeast Asia<br/>(N = 37)<br/>Mean ± SD</b> | <b>Northwest Asia<br/>(N = 45)<br/>Mean ± SD</b> | <b>Southeast Asia<br/>(N = 45)<br/>Mean ± SD</b> | <b>South Asia<br/>(N = 49)<br/>Mean ± SD</b> | <b>Central Asia<br/>(N = 72)<br/>Mean ± SD</b> |
|-----------------------------|--------------------------------------------------|--------------------------------------------------|--------------------------------------------------|----------------------------------------------|------------------------------------------------|
| <b>Bio1</b>                 | 62.49 ± 55.39                                    | 117.58 ± 54.30                                   | 256.47 ± 19.29                                   | 255.57 ± 14.80                               | 128.72 ± 41.10                                 |
| <b>Bio2</b>                 | 115.22 ± 15.44                                   | 124.38 ± 20.14                                   | 102.02 ± 16.11                                   | 127.24 ± 16.12                               | 130.08 ± 13.89                                 |
| <b>Bio3</b>                 | 25.14 ± 2.04                                     | 31.02 ± 4.47                                     | 51.58 ± 7.19                                     | 42.8 ± 4.58                                  | 32.4 ± 3.52                                    |
| <b>Bio8</b>                 | 207.86 ± 31.97                                   | 107.89 ± 67.90                                   | 271.47 ± 11.68                                   | 283.92 ± 23.02                               | 92.04 ± 42.23                                  |
| <b>Bio12</b>                | 821.59 ± 299.98                                  | 301.24 ± 201.00                                  | 1477.69 ± 380.18                                 | 750.39 ± 329.19                              | 285.67 ± 145.24                                |
| <b>Bio14</b>                | 12.14 ± 11.72                                    | 5.18 ± 8.99                                      | 6.33 ± 4.34                                      | 2.47 ± 3.44                                  | 2.51 ± 4.98                                    |
| <b>Bio15</b>                | 95.35 ± 24.52                                    | 65.4 ± 20.35                                     | 84.78 ± 7.25                                     | 124.47 ± 23.48                               | 70.92 ± 12.92                                  |
| <b>Bio19</b>                | 42.51 ± 38.23                                    | 88.33 ± 67.16                                    | 48.02 ± 24.91                                    | 34 ± 33.99                                   | 92.15 ± 45.19                                  |

1101
